# **Talin-KANK1 interaction controls the recruitment of cortical microtubule stabilizing complexes to focal adhesions**

**Benjamin P. Bouchet<sup>1</sup>, Rosemarie E. Gough<sup>2</sup>, Dieudonné van de Willige<sup>1</sup>, York-Christoph Ammon<sup>1</sup>, Harm Post<sup>4</sup>, Guillaume Jacquemet<sup>3</sup>, A. F. Maarten Altelaar<sup>4</sup>, Albert J. R. Heck<sup>4</sup>, Benjamin T. Goult<sup>2\*</sup> and Anna Akhmanova<sup>1\*</sup>**

<sup>1</sup> Cell Biology, Department of Biology, Faculty of Science, Utrecht University, Padualaan 8, 3584 CH Utrecht, The Netherlands.

<sup>2</sup> School of Biosciences, University of Kent, Canterbury, Kent, CT2 7NJ, UK.

<sup>3</sup> Turku Centre for Biotechnology, University of Turku, FIN-20520, Finland.

<sup>4</sup> Biomolecular Mass Spectrometry and Proteomics, Bijvoet Center for Biomolecular Research, Utrecht Institute for Pharmaceutical Sciences and The Netherlands Proteomics Centre, Utrecht University, Padualaan 8, 3584 CH Utrecht, The Netherlands.

\* Corresponding authors

Anna Akhmanova, Cell Biology, Faculty of Science, Utrecht University, Padualaan 8, 3584 CH, Utrecht, the Netherlands, Tel. 31-(0)30-253 2328, Fax 31-(0)30-253 2837, e-mail: [a.akhmanova@uu.nl](mailto:a.akhmanova@uu.nl)

Ben Goult, School of Biosciences, University of Kent, Canterbury, Kent, CT2 7NJ, UK, Tel. 44-(0)1227 816142, e-mail: [b.t.goult@kent.ac.uk](mailto:b.t.goult@kent.ac.uk)

## Abstract

The cross-talk between dynamic microtubules and integrin-based adhesions to the extracellular matrix plays a crucial role in cell polarity and migration. Microtubules regulate the turnover of adhesion sites, and, in turn, focal adhesions promote cortical microtubule capture and stabilization in their vicinity, but the underlying mechanism is unknown. Here, we show that cortical microtubule stabilization sites containing CLASPs, KIF21A, LL5 $\beta$  and liprins are recruited to focal adhesions by the adaptor protein KANK1, which directly interacts with the major adhesion component, talin. Structural studies showed that the conserved KN domain in KANK1 binds to the talin rod domain R7. Perturbation of this interaction, including a single point mutation in talin, which disrupts KANK1 binding but not the talin function in adhesion, abrogates the association of microtubule-stabilizing complexes with focal adhesions. We propose that the talin-KANK1 interaction links the two macromolecular assemblies that control cortical attachment of actin fibers and microtubules.

# Introduction

Cell adhesions to the extracellular matrix support epithelial integrity and cell migration, and also provide signaling hubs that coordinate cell proliferation and survival (Hynes, 1992). Integrin-based adhesions (focal adhesions, FAs) are large macromolecular assemblies, in which the cytoplasmic tails of integrins are connected to the actin cytoskeleton. One of the major components of FAs is talin, a ~2500 amino acid dimeric protein, which plays a key role in adhesion formation by activating integrins (Anthis et al., 2009), coupling them to cytoskeletal actin (Atherton et al., 2015), regulating adhesion dynamics and recruiting different structural and signaling molecules (Calderwood et al., 2013; Gardel et al., 2010; Wehrle-Haller, 2012).

While the major cytoskeletal element associated with FAs is actin, microtubules also play an important role in adhesion by regulating FA turnover (Akhmanova et al., 2009; Byron et al., 2015; Kaverina et al., 1999; Kaverina et al., 1998; Krylyshkina et al., 2003; Small and Kaverina, 2003; Stehbens and Wittmann, 2012). Recent proteomics work showed that microtubule-FA cross-talk strongly depends on the activation state of the integrins (Byron et al., 2015). Microtubules can affect adhesions by serving as tracks for delivery of exocytotic carriers (Stehbens et al., 2014), by controlling endocytosis required for adhesion disassembly (Ezratty et al., 2005; Theisen et al., 2012) and by regulating the local activity of signaling molecules such as Rho GTPases (for review, see (Kaverina and Straube, 2011; Stehbens and Wittmann, 2012)).

In contrast to actin, which is directly coupled to FAs, microtubules interact with the plasma membrane sites that surround FAs. A number of proteins have been implicated in microtubule attachment and stabilization in the vicinity of FAs. Among them are the microtubule plus end tracking proteins (+TIPs) CLASP1/2 and the spectraplakins MACF1/ACF7, which are targeted to microtubule tips by EB1 (Drabek et al., 2006; Honnappa et al., 2009; Kodama et al., 2003; Mimori-Kiyosue et al., 2005). The interaction of CLASPs with the cell cortex depends on the phosphatidylinositol 3, 4, 5-trisphosphate (PIP3)-interacting protein LL5 $\beta$ , to which CLASPs bind directly, and is partly regulated by PI-3 kinase activity (Lansbergen et al., 2006). Other components of the same cortical assembly are the scaffolding proteins liprin- $\alpha$ 1 and  $\beta$ 1, a coiled-coil adaptor ELKS/ERC1, and the kinesin-4 KIF21A (Lansbergen et al., 2006; van der Vaart et al., 2013). Both liprins and ELKS are best known for their role in organizing presynaptic secretory sites (Hida and Ohtsuka, 2010; Spangler and Hoogenraad, 2007); in agreement with this function, ELKS is required for efficient constitutive exocytosis in HeLa cells (Grigoriev et al.,

2007; Grigoriev et al., 2011). LL5 $\beta$ , liprins and ELKS form micrometer-sized cortical patch-like structures, which will be termed here cortical microtubule stabilization complexes, or CMSCs. The CMSCs are strongly enriched at the leading cell edges, where they localize in close proximity of FAs but do not overlap with them ((Lansbergen et al., 2006; van der Vaart et al., 2013), reviewed in (Astro and de Curtis, 2015)). They represent a subclass of the previously defined plasma membrane-associated platforms (PMAPs) (Astro and de Curtis, 2015), which have overlapping components such as liprins, but may not be necessarily involved in microtubule regulation, as is the case for liprin-ELKS complexes in neurons, where they are part of cytomatrix at the active zone (Gundelfinger and Fejtova, 2012).

Several lines of evidence support the importance of the CMSC-FA cross-talk. In migrating keratinocytes, LL5 $\beta$  and CLASPs accumulate around FAs and promote their disassembly by targeting the exocytosis of matrix metalloproteases to FA vicinity (Stehbens et al., 2014). Furthermore, liprin- $\alpha$ 1, LL5 $\alpha/\beta$  and ELKS localize to protrusions of human breast cancer cells and are required for efficient cell migration and FA turnover (Astro et al., 2014). In polarized epithelial cells, LL5 $\beta$  and CLASPs are found in the proximity of the basal membrane, and this localization is controlled by the integrin activation state (Hotta et al., 2010). CLASP and LL5-mediated anchoring of MTs to the basal cortex also plays a role during chicken embryonic development, where it prevents the epithelial-mesenchymal transition of epiblast cells (Nakaya et al., 2013). LL5 $\beta$ , CLASPs and ELKS were also shown to concentrate at podosomes, actin-rich structures, which can remodel the extracellular matrix (Proszynski and Sanes, 2013). Interestingly, LL5 $\beta$ -containing podosome-like structures are also formed at neuromuscular junctions (Kishi et al., 2005; Proszynski et al., 2009; Proszynski and Sanes, 2013), and the complexes of LL5 $\beta$  and CLASPs were shown to capture microtubule plus ends and promote delivery of acetylcholine receptors (Basu et al., 2015; Basu et al., 2014; Schmidt et al., 2012).

While the roles of CMSCs in migrating cells and in tissues are becoming increasingly clear, the mechanism underlying their specific targeting to integrin adhesion sites remains elusive. Recently, we found that liprin- $\beta$ 1 interacts with KANK1 (van der Vaart et al., 2013), one of the four members of the KANK family of proteins, which were proposed to act as tumor suppressors and regulators of cell polarity and migration through Rho GTPase signaling (Gee et al., 2015; Kakinuma et al., 2008; Kakinuma et al., 2009; Li et al., 2011; Roy et al., 2009). KANK1 recruits the kinesin-4 KIF21A to CMSCs, which inhibits microtubule polymerization

1 and prevents microtubule overgrowth at the cell edge (Kakinuma and Kiyama, 2009; van der  
2 Vaart et al., 2013). Furthermore, KANK1 participates in clustering of the other CMSC  
3 components (van der Vaart et al., 2013).

4 Here, we found that KANK1 is required for the association of the CMSCs with FAs. The  
5 association of KANK1 with FAs depends on the KN domain, a conserved 30 amino acid  
6 polypeptide sequence present in the N-termini of all KANK proteins. Biochemical and structural  
7 analysis showed that the KN domain interacts with the R7 region of the talin rod. Perturbation of  
8 this interaction both from the KANK1 and the talin1 side prevented the accumulation of CMSC  
9 complexes around focal adhesions and affected microtubule organization around FAs. We  
10 propose that KANK1 molecules, recruited by talin to the outer rims of FA, serve as “seeds” for  
11 organizing other CMSC components in FA vicinity through multivalent interactions between  
12 these components. This leads to co-organization of two distinct cortical assemblies, FAs and  
13 CMSCs, responsible for the attachment of actin and microtubules, respectively, and ensures  
14 effective cross-talk between the two types of cytoskeletal elements.

# Results

## Identification of talin1 as a KANK1 binding partner

Our previous work showed that the endogenous KANK1 colocalizes with LL5 $\beta$ , liprins and KIF21A in cortical patches that are closely apposed to, but do not overlap with FAs (van der Vaart et al., 2013). We confirmed these results both in HeLa cells and the HaCaT immortal keratinocyte cell line, in which CMSC components CLASPs and LL5 $\beta$  were previously shown to strongly cluster around FAs and regulate their turnover during cell migration (Stehbens et al., 2014) (Figure 1 - Figure Supplement 1A,B). Inhibition of myosin-II with blebbistatin, which reduces tension on the actin fibers and affects the activation state of FA molecules, such as integrins and talin (Parsons et al., 2010), caused a strong reduction in clustering of CMSC components at the cell periphery (Figure 1 - Figure Supplement 2A,B), as described previously (Stehbens et al., 2014). These data support the view that the organization of CMSCs at the cell cortex might be controlled by tension-sensitive components of FAs.

To identify the domains of KANK1 required for cortical localization, we performed deletion mapping. KANK1 comprises an N-terminal KANK family-specific domain of unknown function, the KN domain (residues 30-68) (Kakinuma et al., 2009), a coiled coil region, the N-terminal part of which interacts with liprin- $\beta$ 1, and a C-terminal ankyrin repeat domain, which binds to KIF21A (van der Vaart et al., 2013), while the rest of the protein is predicted to be unstructured (Figure 1A). Surprisingly, the KN domain alone strongly and specifically accumulated within FAs (Figure 1B). A similar localization was also seen with a somewhat larger N-terminal fragment of KANK1, Nter, as well as the Nter-CC1 deletion mutant, which contained the first, liprin- $\beta$ 1-binding coiled coil region of KANK1 (Figure 1A,B). However, an even larger N-terminal part of KANK1, encompassing the whole coiled coil domain (Nter-CC) showed a pronounced enrichment at the FA rim (Figure 1A,B). The KANK1 deletion mutant missing only the C-terminal ankyrin repeat domain ( $\Delta$ ANKR) was completely excluded from FAs but accumulated in their immediate vicinity, similar to the full-length KANK1 (Figure 1A,B). A tight ring-like localization at the outer rim of FAs was also observed with a KANK1 mutant, which completely missed the coiled coil region but contained the ankyrin repeat domain ( $\Delta$ CC), while the mutant which missed just the KN domain showed no accumulation around FAs (Figure 1A,B). To test whether the exclusion of larger KANK1 fragments from the FA core was simply due to the protein size, we fused GFP-tagged KN domain to the bacterial protein  $\beta$ -D-

galactosidase (LacZ), but found that this fusion accumulated inside and not around FAs (Figure 1 - Figure Supplement 2C). Since GFP-KN-LacZ and GFP-KANK1- $\Delta$ ANKRD have a similar size (1336 and 1400 amino acids, respectively), but one accumulates inside FAs, while the other is excluded to their periphery, this result suggests that features other than the mere protein size determine the specific localization of KANK1 to the FA rim. We conclude that the KN domain of KANK1 has affinity for FAs, but the presence of additional KANK1 sequences prevents the accumulation of the protein inside FAs and instead leads to the accumulation of KANK1 at the FA periphery.

To identify the potential FA-associated partners of KANK1, we co-expressed either full-length KANK1 or its N-terminal and C-terminal fragments fused to GFP and a biotinylation (Bio) tag together with biotin ligase BirA in HEK293T cells and performed streptavidin pull down assays combined with mass spectrometry. In addition to the already known binding partners of KANK1, such as KIF21A, liprins and LL5 $\beta$ , we identified talin1 among the strongest hits (Figure 1C). Talin2 was also detected in a pull down with the KANK1 N-terminus though not with the full-length protein (Figure 1C). The interaction between KANK1 and talin1 was confirmed by Western blotting, and subsequent deletion mapping showed that the talin1-binding region of KANK1 encompasses the KN domain (Figure 1A,D), while liprin- $\beta$ 1 binds to the N-terminal part of the coiled coil domain, as shown previously (van der Vaart et al., 2013).

Sequence analysis of the KN domain showed that it is predicted to form a helix and contains a completely conserved leucine aspartic acid-motif (LD-motif) (Alam et al., 2014; Zacharchenko et al., 2016). The LD-motifs in RIAM (Goult et al., 2013), DLC1 and Paxillin (Zacharchenko et al., 2016) have recently been identified as talin-binding sites that all interact with talin via a helix addition mechanism. Alignment of the KN domain of KANK with the LD-motif of DLC1, RIAM and Paxillin (Zacharchenko et al., 2016) revealed that the hydrophobic residues that mediate interaction with talin are present in the KN domain (Figure 1E).

Using deletion analysis, we mapped the KANK1-binding site of talin1 to the central region of the talin rod, comprising the R7-R8 domains (Figure 1F). This R7-R8 region of talin is unique (Gingras et al., 2010), as the 4-helix bundle R8 is inserted into a loop of the 5-helix bundle R7, and thus protrudes from the linear chain of 5-helix bundles of the talin rod (Figure 1F, 2A). This R8 domain serves as a binding hub for numerous proteins including vinculin, synemin and actin (Calderwood et al., 2013). R8 also contains a prototypic recognition site for LD-motif

proteins, including DLC1 (Figure 2B), Paxillin and RIAM (Zacharchenko et al., 2016). Based on the presence of the LD-binding site, we anticipated that KANK1 would also interact with R8. However, deletion mapping revealed that KANK1 in fact binds to the talin1 rod domain R7 (Figure 1F,G), suggesting that KANK1 interacts with a novel binding site on talin1.

## Structural characterization and mutational analysis of the KANK1-talin1 complex

To explore the interaction between talin1 and KANK1 in more detail, we used NMR chemical shift mapping using  $^{15}\text{N}$ -labeled talin1 R7-R8 (residues 1357-1653) and a synthetic KANK1 peptide of the KN domain, KANK1(30-60). The addition of the KANK1(30-60) peptide resulted in large spectral changes (Figure 2C), most of which were in the slow exchange regime on the NMR timescale indicative of a tight interaction. In agreement with the pull down data, the signals that shifted in slow exchange upon the addition of KANK1(30-60) mapped largely onto the R7 domain with only small progressive shift changes evident on R8. To validate R7 as the major KANK1-binding site on talin, we repeated the NMR experiments using the individual domains, R8 (residues 1461-1580) and R7 (residues 1359-1659  $\Delta$ 1454-1586). Addition of KANK1(30-60) induced small chemical shift changes on the R8 domain indicative of a weak interaction (most likely due to interaction of LD with the LD-recognition box on R8). However, the addition of a 0.5 molar ratio of KANK1(30-60) to R7 induced large spectral changes with many of the peaks displaying two locations, corresponding to the free peak position and the bound peak position. This is indicative of slow-exchange and confirms a high affinity interaction between R7 and KANK1. The KN peptide is the first identified ligand for the R7 domain.

NMR chemical shifts also provide information on the residues involved in the interaction, as the peaks in the  $^{15}\text{N}$ -HSQC spectrum pertain to individual residues in the protein. To map these chemical shift changes onto the structure of R7-R8, it was first necessary to complete the backbone chemical shift assignments of the R7 domain. This was achieved using conventional triple resonance experiments as described previously (Banno et al., 2012), using  $^{13}\text{C}$ ,  $^{15}\text{N}$  labeled R7. The chemical shift changes mapped predominantly onto one face of R7, comprised of helices 2 and 5 of the 5-helix bundle (talin rod helices 29 and 36), as shown in Figure 2D-E.

Our recent elucidation of the interaction between the LD-motif of DLC1 and talin R8 has generated insight into how LD-motifs are recognized by helical bundles (PDB ID. 5FZT, (Zacharchenko et al., 2016)). In the DLC1:talin R8 complex the DLC1 peptide adopts a helical



conformation that packs against two helices on the side of the helical bundle. It is becoming increasingly clear that other LD-motif proteins bind to talin through a similar interaction mode (Zacharchenko et al., 2016). The surface of  $\alpha 2$  and  $\alpha 5$  on R7 forms a hydrophobic groove that the KANK1 helix docks into. A striking feature of this KANK1 binding surface is that the two helices are held apart by the conserved aromatic residues, W1630 at the end of  $\alpha 5$  and Y1389 at the end of  $\alpha 2$  (Figure 2B,E). W1630 and Y1389 thus essentially serve as molecular rulers, separating helices  $\alpha 2$  and  $\alpha 5$  by  $\sim 8\text{\AA}$  (compared with  $\sim 5\text{-}6\text{\AA}$  for the other bundles in R7-R8). The spacing between the two helices is enhanced further as the residues on the inner helical faces, S1400, G1404, S1411 on  $\alpha 2$  and S1637 and S1641 on  $\alpha 5$ , have small side chains which have the effect of creating two conserved pockets midway along the hydrophobic groove of the KANK1-binding site (Figure 2E).

The talin-binding site on KANK1 is unusual as it contains a double LD-motif, LDLD. The structure of R7 revealed a potential LD-recognition box with the positive charges, K1401 and R1652 positioned on either side to engage either one, or both, of the aspartic residues. Using the docking program HADDOCK (van Zundert et al., 2016), we sought to generate a structural model of the KANK1/R7 complex, using the chemical shift mapping on R7 and a model of KANK1(30-60) as a helix (created by threading the KANK1 sequence onto the DLC1 LD-motif helix). This analysis indicated that the KANK-LD helix can indeed pack against the sides of  $\alpha 2$  and  $\alpha 5$  (Figure 2E). Interestingly, all of the models, irrespective of which way the KANK1 helix ran along the surface, positioned the bulky aromatic residue, Y48 in KANK1, in the hydrophobic pocket created by G1404. This raised the possibility that mutation of G1404 to a bulky hydrophobic residue might block KANK1 binding by preventing Y48 engagement. We also noticed that S1641, one of the small residues that create the pocket, has been shown to be phosphorylated *in vivo* (Ratnikov et al., 2005) and might have a regulatory function in the KANK1-talin1 interaction.

To test these hypotheses, we generated a series of point mutants in talin R7 and also in the KANK1 KN-domain, designed to disrupt the talinR7/KANK1 interaction. On the KANK1 side, we mutated the LDLD motif to AAAA, (the KANK1-4A mutant), while on the talin1 side, we generated a series of R7 mutants. These included G1404L, in which a bulky hydrophobic residue was introduced instead of glycine to occlude the hydrophobic pocket in R7, S1641E, a phosphomimetic mutant aimed to test the role of talin phosphorylation in regulating KANK1

binding, and W1630A, a substitution that would remove one of the molecular rulers holding  $\alpha 2$  and  $\alpha 5$  helices apart at a fixed distance. These mutants were introduced into talin1 R7-R8 and the structural integrity of the mutated proteins confirmed using NMR (Figure 2 – Figure Supplement 1). The relative binding affinities were measured using an *in vitro* fluorescence polarization assay. In this assay, the KANK1(30-60) peptide is fluorescently labeled with BODIPY and titrated with an increasing concentration of talin R7-R8, and the binding between the two polypeptides results in an increase in the fluorescence polarization signal (Figure 2F). The KANK1-4A mutant abolished binding to talin (Figure 2C,F). The S1641E mutant had only a small effect on binding (Figure 2G), suggesting that either talin1 phosphorylation does not play a major role in modulating the interaction with KANK1 or that the S-E mutation is not a good phosphomimetic, possibly because phosphorylation might also affect helix formation integrity, an effect not mimicked by a single aspartate residue. However, strikingly, both the W1630A and the G1404L mutants abolished binding of KANK1 to talin R7 (Figure 2G), confirming the validity of our model. Finally, we also tested whether the KN-R7 interaction is conserved in talin2 and KANK2, and found that this was indeed the case (Figure 2 - Figure Supplement 2). We conclude that the conserved KN domain of KANKs is a talin-binding site.

### **Talin1-KANK1 interaction controls cortical organization of CMSC components**

Next, we set out to test the importance of the identified interactions in a cellular context by using the KANK1-4A and the talin G1404L mutants. We chose the G1404L talin mutant over W1630A for our cellular studies, because removing the bulky tryptophan from the hydrophobic core of the R7 might have the off target effect of perturbing the mechanical stability of R7, and our recent studies showed that the mechanostability of R7 is important for protecting R8 from force-induced talin extension (Yao et al., 2016). As could be expected based on the binding experiments with protein fragments, introducing the 4A mutation in KANK1 and the G1404L substitution in full-length talin abrogated the interaction of the full-length proteins (Figure 3A,B).

To investigate the localization of KANK1-4A, we used HeLa cells depleted of endogenous KANK1 and KANK2, the two KANK isoforms present in these cells based on our proteomics studies (van der Vaart et al., 2013), in order to exclude the potential oligomerization of the mutant KANK1 with the endogenous proteins. Rescue experiments were performed using GFP-KANK1, resistant for the used siRNAs due to several silent mutations (van der Vaart et al.,

2013), or its 4A mutant. We also included in this analysis a KANK1 mutant lacking the liprin- $\beta$ 1-binding coiled coil domain (the  $\Delta$ CC deletion mutant, Figure 1A), and the 4A-version of the KANK1- $\Delta$ CC deletion mutant. Total Internal Reflection Fluorescence Microscopy (TIRFM)-based live imaging showed that, consistent with our previous results, the GFP-tagged wild type KANK1 strongly accumulated in cortical patches that were tightly clustered around FAs (Figure 3C,D). The KANK1- $\Delta$ CC mutant, which lacked the liprin- $\beta$ 1-binding site but contained an intact KN motif, showed highly specific ring-like accumulations at the rims of FAs (Figure 3C,D). In contrast, KANK1-4A was not clustered anymore around FAs but was dispersed over the cell cortex (Figure 3C,D). The KANK1- $\Delta$ CC-4A mutant, lacking both the liprin- $\beta$ 1 and the talin-binding sites, and the KN-4A mutant were completely diffuse (Figure 3C,D).

To test the impact of the talin1-G1404L mutant, we depleted both talin1 and talin2, which are co-expressed in HeLa cells, and rescued them by introducing mouse GFP-talin1, which was resistant to used siRNAs. The depletion of the two talin proteins resulted in a dramatic loss of FAs and cell detachment from coverslips (data not shown), in agreement with the well-established essential role of talin1 in FA formation (Calderwood et al., 2013; del Rio et al., 2009; Yan et al., 2015; Yao et al., 2014). Therefore, in this experiment only cells expressing GFP-talin1 displayed normal attachment and spreading (Figure 3 – Figure Supplement 1). The same was true for the GFP-talin1-G1404L mutant (Figure 3 – Figure Supplement 1), indicating that this mutant is functional in supporting FA formation. Strikingly, while in cells expressing the wild-type talin1, KANK1 was prominently clustered around FAs, it was dispersed over the plasma membrane in cells expressing talin1-G1404L (Figure 3E,F, Figure 1 – Figure Supplement 1). We conclude that perturbing the KANK1-talin interaction, including the use of a single point mutation in the ~2500 amino acid long talin1 protein, which does not interfere with the talin function in FA formation, abrogates KANK1 association with FAs.

We next tested whether mislocalization of KANK1 due to the perturbation of KANK1-talin1 binding affected other CMSC components. The localization of GFP-KANK1 and its mutants relative to FAs labeled with endogenous markers was very similar to that described above based on live imaging experiments (Figure 4A). Co-depletion of KANK1 and KANK2 abolished clustering of CMSC components, such as LL5 $\beta$  and KIF21A at the cell edge (Figure 4B,C). Wild type GFP-KANK1 could rescue cortical clustering of these proteins in KANK1 and KANK2-depleted cells (Figure 4B, C). However, this was not the case for the KANK1-4A

mutant, the KANK1- $\Delta$ CC mutant or the KANK1 version bearing both mutations (Figure 4B, C). Importantly, the dispersed puncta of the KANK1-4A mutant still colocalized with LL5 $\beta$ , as the binding to liprin- $\beta$ 1 was intact in this mutant (Figure 3A, Figure 4B,C), while the FA-associated rings of KANK1- $\Delta$ CC, the mutant deficient in liprin- $\beta$ 1 binding, showed a mutually exclusive localization with LL5 $\beta$  (Figure 4B). In contrast, KIF21A, which binds to the ankyrin repeat domain of KANK1, could still colocalize with KANK1- $\Delta$ CC at FA rims (Figure 4B). The overall accumulation of KIF21A at the cell periphery was, however, reduced, in line with the strongly reduced KANK1 peripheral clusters observed with the KANK1- $\Delta$ CC mutant. The diffuse localization of the KANK1-4A- $\Delta$ CC mutant led to the strongly dispersed distribution of the CMSC markers (Figure 4B,C). Furthermore, only the full-length wild type KANK1, but neither the 4A nor  $\Delta$ CC mutant could support efficient accumulation of CLASP2 at the peripheral cell cortex in KANK1 and KANK2-depleted cells (Figure 4D, E), in line with the fact that cortical recruitment of CLASPs depends on LL5 $\beta$  (Lansbergen et al., 2006).

Next, we investigated whether disrupting the KANK1-talin1 interaction from the talin1 side would affect also CMSC localization and found that this was indeed the case: both LL5 $\beta$  and KIF21A were clustered around FAs in talin1 and talin2-depleted cells rescued with the wild type GFP-talin1, but not in the cells expressing the GFP-talin1-G1404L mutant, deficient in KANK1 binding (Figure 4F,G).

Our data showed that KANK1- $\Delta$ CC could not support proper clustering of CMSC components at the cell edge in spite of its tight accumulation at the FA rims. These data indicate that in addition to binding to talin1, the localization of CMSC clusters depends on the KANK1-liprin- $\beta$ 1 connection. This notion is supported by the observation that the overexpressed coiled coil region of KANK1 (CC1), which can compete for liprin- $\beta$ 1 binding but cannot interact with talin1, acted as a very potent dominant negative, which suppressed accumulation of LL5 $\beta$  at the cell periphery (Figure 4H,I). We conclude that the core CMSC protein LL5 $\beta$  as well as the microtubule-binding CMSC components KIF21A and CLASP2 depend on the KANK1 interaction with both talin1 and liprin- $\beta$ 1 for their efficient clustering in the vicinity of focal adhesions at the cell periphery.

## **Disruption of KANK1-talin1 binding perturbs microtubule plus end organization at the cell periphery**

We next investigated the impact of the disruption of KANK1-talin1 interaction on microtubule organization. Due to their stereotypic round shape, HeLa cells represent a particularly convenient model for studying the impact of CMSCs on the distribution and dynamics of microtubule plus ends (Lansbergen et al., 2006; Mimori-Kiyosue et al., 2005; van der Vaart et al., 2013). In this cell line, microtubules grow rapidly in the central parts of the cell, while at the cell margin, where CMSCs cluster in the vicinity of peripheral FAs, microtubule plus ends are tethered to the cortex and display persistent but slow growth due to the combined action of several types of microtubule regulators, including CLASPs, spectraplakins and KIF21A (Drabek et al., 2006; Mimori-Kiyosue et al., 2005; van der Vaart et al., 2013). This type of regulation prevents microtubule overgrowth at the cell edge and results in an orderly arrangement of microtubule plus ends perpendicular to the cell margin (van der Vaart et al., 2013) (Figure 5A). In cells with perturbed CMSCs, microtubule plus ends at the cell periphery become disorganized: the velocity of their growth at the cell margin increases, and their orientation becomes parallel instead of being perpendicular to the cell edge (van der Vaart et al., 2013) (Figure 5A).

Using live cell imaging of the microtubule plus end marker EB3-mRFP in KANK1/2 depleted cells rescued with the wild-type GFP-KANK1, we could indeed show that microtubule plus end growth velocity was almost 2.5 times slower at the cell margin compared to the central part of the cell, and the majority of microtubules at the cell margin grew at a 60-80° angle to the cell edge (Figure 5B-E). In the KANK1/2 depleted cells expressing KANK1 mutants, the velocity of microtubule growth in central cell regions was not affected, but the growth rate at the cell periphery increased, and microtubules were growing at oblique angles to the cell margin (Figure 5B-E). The increase of the microtubule growth rate observed with the GFP-KANK1-ΔCC mutant was less strong than with the two 4A mutants (Figure 5B-E). This can be explained by the fact that GFP-KANK1-ΔCC was strongly clustered at FA rims (Figure 3C, Figure 5B), and, through its ankyrin repeat domain, could still recruit some KIF21A, a potent microtubule polymerization inhibitor (van der Vaart et al., 2013).

The results with rescue of talin1 and talin2 co-depletion with GFP-talin1 or its G1404L mutant fully supported the conclusions obtained with the KANK1-4A mutant: while in GFP-talin1-expressing cells microtubule growth at the cell edge was three fold slower than in the cell

center, only a 1.5 fold difference was observed in GFP-talin1-G1404L expressing cells, and the proportion of microtubules growing parallel rather than perpendicular to the cell edge greatly increased (Figure 5F-I). We conclude that a single point mutation in talin1, which does not interfere with FA formation, is sufficient to perturb CMSC clustering and, as a consequence, induce microtubule disorganization in the vicinity of peripheral FAs.

## Discussion

In this study, we have shown that the conserved KN motif of KANK1 represents an LD-type ligand of talin, which allows this adaptor protein to accumulate in the vicinity of integrin-based adhesions. This function is likely to be conserved in the animal kingdom, as the KANK orthologue in *C. elegans*, Vab-19, in conjunction with integrins, plays important roles in a dynamic cell-extracellular matrix adhesion developmental process (Ihara et al., 2011). The exact impact of KANK1-talin binding likely depends on the specific system, as the loss of KANK proteins was shown to reduce motility of HeLa cells and podocytes (Gee et al., 2015; Li et al., 2011), but promote insulin-dependent cell migration in HEK293 cells (Kakinuma et al., 2008).

An important question is how KANK-talin1 binding mediates the localization of KANK1 to the rim but not the core of FAs. One possibility, suggested by our deletion analysis of KANK1, is that while the KN peptide alone can penetrate into FAs, larger KN-containing protein fragments are sterically excluded from the dense actin-containing core of the FA. However, our experiment with the KN-LacZ fusion did not support this simple idea, indicating that the underlying mechanism is likely to be more complex and might involve specific disordered or ordered domains and additional partners of KANK1, or other regulatory mechanisms.

Another important question is how KANK1 binding to the rim of focal adhesions can promote CMSC accumulation around these structures, a spatial arrangement in which most of the CMSC molecules cannot be in a direct contact with FAs. Previous work on CMSC complexes showed that they are formed through an intricate network of interactions. The “core” components of these complexes, which can be recruited to the plasma membrane independently of each other, are LL5 $\beta$  (and in some cells, its homologue LL5 $\alpha$ ), liprins and KANKs (of which KANK1 seems to predominate in HeLa cells) (Astro and de Curtis, 2015; Hotta et al., 2010; Lansbergen et al., 2006; van der Vaart et al., 2013) (Figure 6A). The clustering of CMSC components is mutually dependent and relies on homo- and heterodimerization of liprins  $\alpha$ 1 and  $\beta$ 1, the association



1 between KANK1 and liprin- $\beta$ 1, the scaffolding protein ELKS, which binds to both LL5 $\beta$  and  
 2 liprin- $\alpha$ 1, and possibly additional interactions (Astro and de Curtis, 2015; Lansbergen et al.,  
 3 2006; van der Vaart et al., 2013), while the microtubule-binding proteins, such as CLASPs and  
 4 KIF21A, seem to associate as a second “layer” with the membrane-bound CMSC-assemblies  
 5 (Figure 6A). The CMSC “patches” can remain relatively stable for tens of minutes, while their  
 6 individual components are dynamic and exchange with different, characteristic turnover rates  
 7 (van der Vaart et al., 2013).

8 The dynamic assemblies of CMSC components, which are spatially separate from other  
 9 plasma membrane domains and which rely on multivalent protein-protein interactions, are  
 10 reminiscent of cytoplasmic and nucleoplasmic membrane-unbounded organelles such as P  
 11 granules and stress granules, the assembly of which has been proposed to be driven by phase  
 12 transitions (Astro and de Curtis, 2015; Brangwynne, 2013; Hyman and Simons, 2012). The  
 13 formation of such structures, which can be compared to liquid droplets, can be triggered by local  
 14 concentration of CMSC components. It is tempting to speculate that by concentrating KANK1 at  
 15 the FA rims, talin1 helps to “nucleate” CMSC assembly, which can then propagate to form large  
 16 structures surrounding FAs (Figure 6B). Additional membrane-bound cues, such as the presence  
 17 of PIP3, to which LL5 $\beta$  can bind (Paranavitane et al., 2003), can further promote CMSC  
 18 coalescence by increasing concentration of CMSC players in specific areas of the plasma  
 19 membrane. This model helps to explain why the CMSC accumulation at the cell periphery is  
 20 reduced but not abolished when PI3 kinase is inhibited (Lansbergen et al., 2006), and why the  
 21 clustering of all CMSC components is mutually dependent. Most importantly, this model  
 22 accounts for the mysterious ability of the two large and spatially distinct macromolecular  
 23 assemblies, FAs and CMSCs, to form in close proximity of each other.

24 To conclude, our study revealed that a mechanosensitive integrin-associated adaptor talin  
 25 not only participates in organizing the actin cytoskeleton but also directly triggers formation of a  
 26 cortical microtubule-stabilizing macromolecular assembly, which surrounds adhesion sites and  
 27 controls their formation and dynamics by regulating microtubule-dependent signaling and  
 28 trafficking.

# **Experimental Procedures**

## **Cell culture and transfection**

HeLa and HEK293T cell culture and transfection of DNA and siRNA was performed as previously described (van der Vaart et al., 2013). HaCaT cells were purchased at Cell Line Service (Eppelheim, Germany) and cultured according to manufacturer's instructions. Blebbistatin was purchased from Enzo Life Sciences and used at 50  $\mu$ M. Serum starvation in HeLa cells was done for 48 hours and focal adhesion assembly was stimulated by incubation with FCS-positive medium with or without blebbistatin for 2 hours.

## **DNA constructs and siRNAs**

BioGFP-tagged KANK1 mutants were constructed using PCR and pBioGFP-C1 vector as previously described (van der Vaart et al., 2013). Rescue constructs for BioGFP-tagged KANK1 were either based on the version previously described (van der Vaart et al., 2013) or a version obtained by PCR-based mutagenesis of the sequence AGTCAGCGTCTGCGAA to GGTGAGTGTGTGTGAG. mCherry-tagged paxillin construct was made by replacing GFP from pQC-GPXN (Bouchet et al., 2011) by mCherry (pmCherry-C1, Clontech). TagRFP-tagged paxillin construct was made by PCR-based amplification and cloning in pTagRFP-T-C1 (kind gift from Y. Mimori-Kiyosue, Riken Institute, Japan). HA-tagged KANK1 construct was generated by cloning KANK1 coding sequence into pMT2-SM-HA (gift of Dr. C. Hoogenraad, Utrecht University, The Netherlands). BirA coding vector was described before (van der Vaart et al., 2013). GFP-tagged mouse talin 1 construct was a kind gift from Dr. A Huttenlocher (Addgene plasmid # 26724) (Franco et al., 2004). GFP-tagged KN-LacZ fusion was made using PCR-based amplification of KN and LacZ (kind gift, Casper Hoogenraad, Utrecht University, The Netherlands), pBioGFP-C1 vector and Gibson Assembly mix (New England Biolabs). Site directed mutagenesis of KANK1 and talin1 constructs was realized by overlapping PCR-based strategy and validated by sequencing. mCherry-tagged CLASP2 construct was a gift from A. Aher (Utrecht University, The Netherlands). Single siRNAs were ordered from Sigma or Ambion, used at 5-15 nM, validated by Western blot analysis and/or immunofluorescence, and target sequences were the following: human KANK1 #1, CAGAGAAGGACATGCGGAT; human KANK1#2, GAAGTCAGCGTCTGCGAAA, human KANK2#1, ATGTCAACGTGCAAGATGA; human KANK2 #2, TCGAGAATCTCAGCACATA; human



1 talin 1 #1, TCTGTACTGAGTAATAGCCAT; human talin 1 #2,  
2 TGAATGTCCTGTCAACTGCTG; human talin 2 #1, TTTCGTTTTTCATCTACTCCTT; human  
3 talin 2 #2, TTCGTGTTTGGATTCGTCGAC.

#### 4 5 **Pull down assays and mass spectrometry**

6 Streptavidin-based pull down assays of biotinylated proteins expressed using pBioGFP-C1  
7 constructs transfected in HEK 293T cells was performed and analyzed as previously described  
8 (van der Vaart et al., 2013). For mass spectrometry sample preparation, streptavidin beads  
9 resulting from pull-downs assays were ran on a 12% Bis-Tris 1D SDS-PAGE gel (Biorad) for 1  
10 cm and stained with colloidal coomassie dye G-250 (Gel Code Blue Stain Reagent, Thermo  
11 Scientific). The lane was cut and treated with 6.5 mM dithiothreitol (DTT) for 1 h at 60 °C for  
12 reduction and 54 mM iodoacetamide for 30 min for alkylation. The proteins were digested  
13 overnight with trypsin (Promega) at 37 °C. The peptides were extracted with 100% acetonitrile  
14 (ACN) and dried in a vacuum concentrator. For RP-nanoLC-MS/MS, samples were resuspended  
15 in 10% formic acid (FA) / 5% DMSO and was analyzed using a Proxeon Easy-nLC100 (Thermo  
16 Scientific) connected to an Orbitrap Q-Exactive mass spectrometer. Samples were first trapped  
17 (Dr Maisch Reprosil C18, 3  $\mu$ m, 2 cm x 100  $\mu$ m) before being separated on an analytical column  
18 (Agilent Zorbax 1.8  $\mu$ m SB-C18, 40 cm x 50  $\mu$ m), using a gradient of 180 min at a column flow  
19 of 150 nl min<sup>-1</sup>. Trapping was performed at 8  $\mu$ L/min for 10 min in solvent A (0.1 M acetic acid  
20 in water) and the gradient was as follows 15- 40% solvent B (0.1 M acetic acid in acetonitrile) in  
21 151 min, 40-100% in 3 min, 100% solvent B for 2 min, and 100% solvent A for 13 min.  
22 Nanospray was performed at 1.7 kV using a fused silica capillary that was pulled in-house and  
23 coated with gold (o.d. 360  $\mu$ m; i.d. 20  $\mu$ m; tip i.d. 10  $\mu$ m). The mass spectrometers were used in a  
24 data-dependent mode, which automatically switched between MS and MS/MS. Full scan MS  
25 spectra from m/z 350 – 1500 were acquired at a resolution of 35,000 at m/z 400 after the  
26 accumulation to a target value of 3E6. Up to 20 most intense precursor ions were selected for  
27 fragmentation. HCD fragmentation was performed at normalized collision energy of 25% after  
28 the accumulation to a target value of 5E4. MS2 was acquired at a resolution of 17,500 and  
29 dynamic exclusion was enabled. For data analysis, raw files were processed using Proteome  
30 Discoverer 1.4 (version 1.4.1.14, Thermo Scientific, Bremen, Germany). Database search was  
31 performed using the swiss-prot human database (version 29<sup>th</sup> of January 2015) and Mascot

(version 2.5.1, Matrix Science, UK) as the search engine. Carbamidomethylation of cysteines was set as a fixed modification and oxidation of methionine was set as a variable modification. Trypsin was specified as enzyme and up to two miss cleavages were allowed. Data filtering was performed using percolator (Kall et al., 2007), resulting in 1% false discovery rate (FDR). Additional filter was ion score >20.

## **Antibodies and immunofluorescence cell staining**

Antibodies against HA and GFP tags, and liprin  $\beta$ 1 used for Western blot analysis were previously described (van der Vaart et al., 2013). Immunofluorescent staining of KANK1, LL5 $\beta$ , liprin  $\beta$ 1, KIF21A and CLASP2 in HeLa and HaCaT cells was performed using the antibodies and procedures previously described (Lansbergen et al., 2006; van der Vaart et al., 2013). Phospho-tyrosine mouse antibody (PT-66) was purchased from Sigma and rabbit FAK phospho-tyrosine 397 was purchased from Biosource.

## **Microscopy and analysis**

Fixed samples and corresponding immunofluorescence images were imaged using widefield fluorescence illumination on a Nikon Eclipse 80i or Ni upright microscope equipped with a CoolSNAP HQ2 CCD camera (Photometrics) or a DS-Qi2 camera (Nikon) an Intensilight C-HGFI precentered fiber illuminator (Nikon), ET-DAPI, ET-EGFP and ET-mCherry filters (Chroma), Nikon NIS Br software, Plan Apo VC 100x NA 1.4 oil, Plan Apo Lambda 100X oil NA 1.45 and Plan Apo VC 60x NA 1.4 oil (Nikon) objectives. TIRFM-based live cell imaging was performed using the setup described before (van der Vaart et al., 2013) or a similar Nikon Ti microscope-based Ilas<sup>2</sup> system (ROPER SCIENTIFIC, Evry, FRANCE) equipped with dual laser illuminator for azimuthal spinning TIRF (or Hilo) illumination, 150 mW 488 nm laser and 100 mW 561 nm laser, 49002 and 49008 Chroma filter sets, EMCCD Evolve mono FW DELTA 512x512 camera (Roper Scientific) with the intermediate lens 2.5X (Nikon C mount adapter 2.5X), CCD camera CoolSNAP MYO M-USB-14-AC (Roper Scientific) and controlled with MetaMorph 7.8.8 software (Molecular Device). Simultaneous imaging of green TIRFM imaging was performed as described before (van der Vaart et al., 2013) or using the Optosplit III image splitter device (Andor) on the Ilas<sup>2</sup> system.

For presentation, images were adjusted for brightness and processed by Gaussian blur and Unsharp mask filter using ImageJ 1.47v (NIH). Fluorescence profiles are values measured by line scan analysis under ImageJ, normalized by background average fluorescence, expressed as factor of the baseline value obtained for individual channel and plotted as a function of maximum length factor of the selection line (distance ratio). Protein clustering at the cell edge is the ratio of the total fluorescence in the first 5  $\mu$ m from the cell edge to the next 5  $\mu$ m measured by line scan analysis under ImageJ after thresholding for cell outline marking and out-of-cell region value assigned to zero. Results were plotted as percentage of control condition average value.

EB3-mRFP dynamics was recorded by 0.5 second interval time lapse TIRF imaging. Microtubule growth was measured using kymographs obtained from EB3-mRFP time lapse image series, plotted and presented as previously described (van der Vaart et al., 2013). Ratio of microtubule growth in cell center to periphery was obtained as values for individual cells. Microtubule growth trajectory angle to the cell edge was manually measured under ImageJ using tracks obtained by maximum intensity projection of EB3-mRFP image series.

## **Expression of Recombinant Talin Polypeptides**

The cDNAs encoding murine talin1 residues 1357-1653 (R7-R8), 1357-1653  $\Delta$ 1454-1586 (R7) and 1461-1580 (R8) were synthesized by PCR using a mouse talin1 cDNA as template and cloned into the expression vector pet151-TOPO (Invitrogen) (Gingras et al., 2010). Talin mutants were synthesized by GeneArt. Talin polypeptides were expressed in E. coli BL21(DE3) cultured either in LB for unlabeled protein, or in M9 minimal medium for preparation of isotopically labeled samples for NMR. Recombinant His-tagged talin polypeptides were purified by nickel-affinity chromatography following standard procedures. The His-tag was removed by cleavage with AcTEV protease (Invitrogen), and the proteins were further purified by anion-exchange. Protein concentrations were determined using their respective extinction coefficient at 280 nm.

## **Fluorescence Polarization assays**

KANK peptides with a C-terminal cysteine residue were synthesized by Biomatik (USA):

KANK1(30-60)C – PYFVETPYGFQLDLDFVKYVDDIQKGNTIKKC

KANK1(30-68)C - PYFVETPYGFQLDLDFVKYVDDIQKGNTIKKLNIQKRRKC

KANK1-4A - PYFVETPYGFQAAAFVKYVDDIQKGNTIKKLNIQKRRKC

# KANK2(31-61)C - PYSVETPYGYRLDLDFLKYVDDIEKGHTLRRC

Fluorescence Polarization was carried out on KANK peptides with a carboxy terminal cysteine. Peptide stock solutions were made in PBS (137 mM NaCl, 27 mM KCl, 100 mM Na<sub>2</sub>HPO<sub>4</sub>, 18 mM KH<sub>2</sub>PO<sub>4</sub>), 100 mg/ml TCEP and 0.05% Triton X-100, and coupled via the carboxy terminal cysteine to the Thiol reactive BIODIPY TMR dye (Invitrogen). Uncoupled dye was removed by gel filtration using a PD-10 column (GE Healthcare). The labeled peptide was concentrated to a final concentration of 1 mM using a centricon with 3K molecular weight cut off (Millipore). The Fluorescence Polarization assay was carried out on a black 96well plate (Nunc). Titrations were performed in triplicate using a fixed 0.5  $\mu$ M concentration of peptide and an increasing concentration of Talin R7-R8 protein within a final volume of 100  $\mu$ l of assay buffer (PBS). Fluorescence Polarization measurements were recorded on a BMGLabTech CLARIOstar plate reader at room temperature and analyzed using GraphPad Prism (version 6.07).  $K_d$  values were calculated with a nonlinear curve fitting using a one site total and non-specific binding model.

## NMR Spectroscopy

NMR experiments for the resonance assignment of talin1 R7, residues 1357-1653  $\Delta$ 1454-1586 were carried out with 1 mM protein in 20 mM sodium phosphate, pH 6.5, 50 mM NaCl, 2 mM dithiothreitol, 10% (v/v) 2H<sub>2</sub>O. NMR spectra were obtained at 298 K using a Bruker AVANCE III spectrometer equipped with CryoProbe. Proton chemical shifts were referenced to external 2,2-dimethyl-2-silapentane- 5-sulfonic acid, and <sup>15</sup>N and <sup>13</sup>C chemical shifts were referenced indirectly using recommended gyromagnetic ratios (Wishart et al., 1995). The spectra were processed using Topspin and analyzed using CCPN Analysis (Skinner et al., 2015). Three-dimensional HNCO, HN(CA)CO, HNCA, HN(CO)CA, HNCACB, and CBCA(CO)NH experiments were used for the sequential assignment of the backbone NH, N, CO, CA, and CB resonances.

The backbone resonance assignments of mouse talin1 R7 (1357-1653  $\Delta$ 1454-1586) have been deposited in the BioMagResBank with the accession number 19139.

## Acknowledgements

We thank Y. Mimori-Kiyosue (Riken Institute, Japan), A. Huttenlocher (University of Wisconsin), A. Aher and C. Hoogenraad (Utrecht University, The Netherlands) for the gift of

1 reagents. We are grateful to Dr. I. Grigoriev (Utrecht University, The Netherlands) for assistance  
 2 with microscopy and advice about microtubule dynamics analysis and presentation. This work  
 3 was supported by the Netherlands organization for Scientific Research (NWO) ALW VICI grant  
 4 865.08.002 and a European Research Council (ERC) Synergy grant 609822 to A.A., a BBSRC  
 5 grant (BB/N007336/1) to B.T.G, NWO VIDI grant (723.012.102) for A.F.M.A. and as part of the  
 6 NWO National Roadmap Large-scale Research Facilities of the Netherlands (project number  
 7 184.032.201) for A.F.M.A., A.J.R.H. and H.P., and Fondation pour la Recherche Médicale and  
 8 Marie Curie International Intra-European Fellowship to B.P.B.

# References

- Akhmanova, A., S.J. Stehbens, and A.S. Yap. 2009. Touch, grasp, deliver and control: functional cross-talk between microtubules and cell adhesions. *Traffic*. 10:268-74.
- Alam, T., M. Alazmi, X. Gao, and S.T. Arold. 2014. How to find a leucine in a haystack? Structure, ligand recognition and regulation of leucine-aspartic acid (LD) motifs. *Biochem J*. 460:317-29.
- Anthis, N.J., K.L. Wegener, F. Ye, C. Kim, B.T. Goult, E.D. Lowe, I. Vakonakis, N. Bate, D.R. Critchley, M.H. Ginsberg, and I.D. Campbell. 2009. The structure of an integrin/talin complex reveals the basis of inside-out signal transduction. *EMBO J*. 28:3623-32.
- Astro, V., S. Chiaretti, E. Magistrati, M. Fivaz, and I. de Curtis. 2014. Liprin-alpha1, ERC1 and LL5 define polarized and dynamic structures that are implicated in cell migration. *J Cell Sci*. 127:3862-76.
- Astro, V., and I. de Curtis. 2015. Plasma membrane-associated platforms: dynamic scaffolds that organize membrane-associated events. *Sci Signal*. 8:re1.
- Atherton, P., B. Stutchbury, D.Y. Wang, D. Jethwa, R. Tsang, E. Meiler-Rodriguez, P. Wang, N. Bate, R. Zent, I.L. Barsukov, B.T. Goult, D.R. Critchley, and C. Ballestrem. 2015. Vinculin controls talin engagement with the actomyosin machinery. *Nat Commun*. 6:10038.
- Banno, A., B.T. Goult, H. Lee, N. Bate, D.R. Critchley, and M.H. Ginsberg. 2012. Subcellular localization of talin is regulated by inter-domain interactions. *J Biol Chem*. 287:13799-812.
- Basu, S., S. Sladecsek, Y.V.I. Martinez de la Pena, M. Akaaboune, I. Smal, K. Martin, N. Galjart, and H.R. Brenner. 2015. CLASP2-dependent microtubule capture at the neuromuscular junction membrane requires LL5beta and actin for focal delivery of acetylcholine receptor vesicles. *Mol Biol Cell*.
- Basu, S., S. Sladecsek, H. Pemble, T. Wittmann, J.A. Slotman, W. van Cappellen, H.R. Brenner, and N. Galjart. 2014. Acetylcholine receptor (AChR) clustering is regulated both by glycogen synthase kinase 3beta (GSK3beta)-dependent phosphorylation and the level of CLIP-associated protein 2 (CLASP2) mediating the capture of microtubule plus-ends. *J Biol Chem*. 289:30857-67.
- Bouchet, B.P., F. Fauvet, G. Grelier, C.M. Galmarini, and A. Puisieux. 2011. p21(Cip1) regulates cell-substrate adhesion and interphase microtubule dynamics in untransformed human mammary epithelial cells. *Eur.J.Cell Biol*. 90:631-641.
- Brangwynne, C.P. 2013. Phase transitions and size scaling of membrane-less organelles. *J Cell Biol*. 203:875-81.
- Byron, A., J.A. Askari, J.D. Humphries, G. Jacquemet, E.J. Koper, S. Warwood, C.K. Choi, M.J. Stroud, C.S. Chen, D. Knight, and M.J. Humphries. 2015. A proteomic approach reveals integrin activation state-dependent control of microtubule cortical targeting. *Nat Commun*. 6:6135.
- Calderwood, D.A., I.D. Campbell, and D.R. Critchley. 2013. Talins and kindlins: partners in integrin-mediated adhesion. *Nat Rev Mol Cell Biol*. 14:503-17.
- del Rio, A., R. Perez-Jimenez, R. Liu, P. Roca-Cusachs, J.M. Fernandez, and M.P. Sheetz. 2009. Stretching single talin rod molecules activates vinculin binding. *Science*. 323:638-41.



- 1 Drabek, K., M. van Ham, T. Stepanova, K. Draegestein, R. van Horssen, C.L. Sayas, A.  
2 Akhmanova, T. Ten Hagen, R. Smits, R. Fodde, F. Grosveld, and N. Galjart. 2006. Role  
3 of CLASP2 in microtubule stabilization and the regulation of persistent motility. *Curr*  
4 *Biol.* 16:2259-64.
- 5 Ezratty, E.J., M.A. Partridge, and G.G. Gundersen. 2005. Microtubule-induced focal adhesion  
6 disassembly is mediated by dynamin and focal adhesion kinase. *Nat Cell Biol.* 7:581-90.
- 7 Franco, S.J., M.A. Rodgers, B.J. Perrin, J. Han, D.A. Bennin, D.R. Critchley, and A.  
8 Huttenlocher. 2004. Calpain-mediated proteolysis of talin regulates adhesion dynamics.  
9 *Nat Cell Biol.* 6:977-83.
- 10 Gardel, M.L., I.C. Schneider, Y. Aratyn-Schaus, and C.M. Waterman. 2010. Mechanical  
11 integration of actin and adhesion dynamics in cell migration. *Annu Rev Cell Dev Biol.*  
12 26:315-33.
- 13 Gee, H.Y., F. Zhang, S. Ashraf, S. Kohl, C.E. Sadowski, V. Vega-Warner, W. Zhou, S. Lovric,  
14 H. Fang, M. Nettleton, J.Y. Zhu, J. Hoefele, L.T. Weber, L. Podracka, A. Boor, H.  
15 Fehrenbach, J.W. Innis, J. Washburn, S. Levy, R.P. Lifton, E.A. Otto, Z. Han, and F.  
16 Hildebrandt. 2015. KANK deficiency leads to podocyte dysfunction and nephrotic  
17 syndrome. *J Clin Invest.* 125:2375-84.
- 18 Gingras, A.R., N. Bate, B.T. Goult, B. Patel, P.M. Kopp, J. Emsley, I.L. Barsukov, G.C. Roberts,  
19 and D.R. Critchley. 2010. Central region of talin has a unique fold that binds vinculin and  
20 actin. *J Biol Chem.* 285:29577-87.
- 21 Goult, B.T., T. Zacharchenko, N. Bate, R. Tsang, F. Hey, A.R. Gingras, P.R. Elliott, G.C.  
22 Roberts, C. Ballestrem, D.R. Critchley, and I.L. Barsukov. 2013. RIAM and vinculin  
23 binding to talin are mutually exclusive and regulate adhesion assembly and turnover. *J*  
24 *Biol Chem.* 288:8238-49.
- 25 Grigoriev, I., D. Splinter, N. Keijzer, P.S. Wulf, J. Demmers, T. Ohtsuka, M. Modesti, I.V. Maly,  
26 F. Grosveld, C.C. Hoogenraad, and A. Akhmanova. 2007. Rab6 regulates transport and  
27 targeting of exocytotic carriers. *Dev Cell.* 13:305-14.
- 28 Grigoriev, I., K.L. Yu, E. Martinez-Sanchez, A. Serra-Marques, I. Smal, E. Meijering, J.  
29 Demmers, J. Peranen, R.J. Pasterkamp, P. van der Sluijs, C.C. Hoogenraad, and A.  
30 Akhmanova. 2011. Rab6, Rab8, and MICAL3 Cooperate in Controlling Docking and  
31 Fusion of Exocytotic Carriers. *Curr Biol.* 21:967-74.
- 32 Gundelfinger, E.D., and A. Fejtova. 2012. Molecular organization and plasticity of the cytomatrix  
33 at the active zone. *Curr Opin Neurobiol.* 22:423-30.
- 34 Hida, Y., and T. Ohtsuka. 2010. CAST and ELKS proteins: structural and functional  
35 determinants of the presynaptic active zone. *J Biochem.* 148:131-7.
- 36 Honnappa, S., S.M. Gouveia, A. Weisbrich, F.F. Damberger, N.S. Bhavesh, H. Jawhari, I.  
37 Grigoriev, F.J. van Rijssel, R.M. Buey, A. Lawera, I. Jelesarov, F.K. Winkler, K.  
38 Wuthrich, A. Akhmanova, and M.O. Steinmetz. 2009. An EB1-binding motif acts as a  
39 microtubule tip localization signal. *Cell.* 138:366-76.
- 40 Hotta, A., T. Kawakatsu, T. Nakatani, T. Sato, C. Matsui, T. Sukezane, T. Akagi, T. Hamaji, I.  
41 Grigoriev, A. Akhmanova, Y. Takai, and Y. Mimori-Kiyosue. 2010. Laminin-based cell  
42 adhesion anchors microtubule plus ends to the epithelial cell basal cortex through  
43 LL5alpha/beta. *J Cell Biol.* 189:901-17.

- 1 Hyman, A.A., and K. Simons. 2012. Cell biology. Beyond oil and water--phase transitions in  
2 cells. *Science*. 337:1047-9.
- 3 Hynes, R.O. 1992. Integrins: versatility, modulation, and signaling in cell adhesion. *Cell*. 69:11-  
4 25.
- 5 Ihara, S., E.J. Hagedorn, M.A. Morrissey, Q. Chi, F. Motegi, J.M. Kramer, and D.R. Sherwood.  
6 2011. Basement membrane sliding and targeted adhesion remodels tissue boundaries  
7 during uterine-vulval attachment in *Caenorhabditis elegans*. *Nat Cell Biol*. 13:641-51.
- 8 Kakinuma, N., and R. Kiyama. 2009. A major mutation of KIF21A associated with congenital  
9 fibrosis of the extraocular muscles type 1 (CFEOM1) enhances translocation of Kank1 to  
10 the membrane. *Biochem Biophys Res Commun*. 386:639-44.
- 11 Kakinuma, N., B.C. Roy, Y. Zhu, Y. Wang, and R. Kiyama. 2008. Kank regulates RhoA-  
12 dependent formation of actin stress fibers and cell migration via 14-3-3 in PI3K-Akt  
13 signaling. *J Cell Biol*. 181:537-49.
- 14 Kakinuma, N., Y. Zhu, Y. Wang, B.C. Roy, and R. Kiyama. 2009. Kank proteins: structure,  
15 functions and diseases. *Cell Mol Life Sci*. 66:2651-9.
- 16 Kall, L., J.D. Canterbury, J. Weston, W.S. Noble, and M.J. MacCoss. 2007. Semi-supervised  
17 learning for peptide identification from shotgun proteomics datasets. *Nat Methods*. 4:923-  
18 5.
- 19 Kaverina, I., O. Krylyshkina, and J.V. Small. 1999. Microtubule targeting of substrate contacts  
20 promotes their relaxation and dissociation. *J Cell Biol*. 146:1033-44.
- 21 Kaverina, I., K. Rottner, and J.V. Small. 1998. Targeting, capture, and stabilization of  
22 microtubules at early focal adhesions. *J Cell Biol*. 142:181-90.
- 23 Kaverina, I., and A. Straube. 2011. Regulation of cell migration by dynamic microtubules. *Semin*  
24 *Cell Dev Biol*. 22:968-74.
- 25 Kishi, M., T.T. Kummer, S.J. Eglen, and J.R. Sanes. 2005. LL5beta: a regulator of postsynaptic  
26 differentiation identified in a screen for synaptically enriched transcripts at the  
27 neuromuscular junction. *J Cell Biol*. 169:355-66.
- 28 Kodama, A., I. Karakesisoglou, E. Wong, A. Vaezi, and E. Fuchs. 2003. ACF7: an essential  
29 integrator of microtubule dynamics. *Cell*. 115:343-54.
- 30 Krylyshkina, O., K.I. Anderson, I. Kaverina, I. Upmann, D.J. Manstein, J.V. Small, and D.K.  
31 Toomre. 2003. Nanometer targeting of microtubules to focal adhesions. *J Cell Biol*.  
32 161:853-9.
- 33 Lansbergen, G., I. Grigoriev, Y. Mimori-Kiyosue, T. Ohtsuka, S. Higa, I. Kitajima, J. Demmers,  
34 N. Galjart, A.B. Houtsmuller, F. Grosveld, and A. Akhmanova. 2006. CLASPs attach  
35 microtubule plus ends to the cell cortex through a complex with LL5beta. *Dev Cell*.  
36 11:21-32.
- 37 Li, C.C., J.C. Kuo, C.M. Waterman, R. Kiyama, J. Moss, and M. Vaughan. 2011. Effects of  
38 brefeldin A-inhibited guanine nucleotide-exchange (BIG) 1 and KANK1 proteins on cell  
39 polarity and directed migration during wound healing. *Proc Natl Acad Sci U S A*.  
40 108:19228-33.
- 41 Mimori-Kiyosue, Y., I. Grigoriev, G. Lansbergen, H. Sasaki, C. Matsui, F. Severin, N. Galjart, F.  
42 Grosveld, I. Vorobjev, S. Tsukita, and A. Akhmanova. 2005. CLASP1 and CLASP2 bind



to EB1 and regulate microtubule plus-end dynamics at the cell cortex. *J Cell Biol.* 168:141-53.

Nakaya, Y., E.W. Sukowati, and G. Sheng. 2013. Epiblast integrity requires CLASP and Dystroglycan-mediated microtubule anchoring to the basal cortex. *J Cell Biol.* 202:637-51.

Paranavitane, V., W.J. Coadwell, A. Eguinoa, P.T. Hawkins, and L. Stephens. 2003. LL5beta is a phosphatidylinositol (3,4,5)-trisphosphate sensor that can bind the cytoskeletal adaptor, gamma-filamin. *J Biol Chem.* 278:1328-35.

Parsons, J.T., A.R. Horwitz, and M.A. Schwartz. 2010. Cell adhesion: integrating cytoskeletal dynamics and cellular tension. *Nat Rev Mol Cell Biol.* 11:633-43.

Proszynski, T.J., J. Gingras, G. Valdez, K. Krzewski, and J.R. Sanes. 2009. Podosomes are present in a postsynaptic apparatus and participate in its maturation. *Proc Natl Acad Sci U S A.* 106:18373-8.

Proszynski, T.J., and J.R. Sanes. 2013. Amotl2 interacts with LL5beta, localizes to podosomes and regulates postsynaptic differentiation in muscle. *J Cell Sci.* 126:2225-35.

Ratnikov, B., C. Ptak, J. Han, J. Shabanowitz, D.F. Hunt, and M.H. Ginsberg. 2005. Talin phosphorylation sites mapped by mass spectrometry. *J Cell Sci.* 118:4921-3.

Roy, B.C., N. Kakinuma, and R. Kiyama. 2009. Kank attenuates actin remodeling by preventing interaction between IRSp53 and Rac1. *J Cell Biol.* 184:253-67.

Schmidt, N., S. Basu, S. Sladeczek, S. Gatti, J. van Haren, S. Treves, J. Pielage, N. Galjart, and H.R. Brenner. 2012. Agrin regulates CLASP2-mediated capture of microtubules at the neuromuscular junction synaptic membrane. *J Cell Biol.* 198:421-37.

Skinner, S.P., B.T. Goult, R.H. Fogh, W. Boucher, T.J. Stevens, E.D. Laue, and G.W. Vuister. 2015. Structure calculation, refinement and validation using CcpNmr Analysis. *Acta Crystallogr D Biol Crystallogr.* 71:154-61.

Small, J.V., and I. Kaverina. 2003. Microtubules meet substrate adhesions to arrange cell polarity. *Curr Opin Cell Biol.* 15:40-7.

Spangler, S.A., and C.C. Hoogenraad. 2007. Liprin-alpha proteins: scaffold molecules for synapse maturation. *Biochem Soc Trans.* 35:1278-82.

Stehbens, S., and T. Wittmann. 2012. Targeting and transport: How microtubules control focal adhesion dynamics. *J Cell Biol.* 198:481-9.

Stehbens, S.J., M. Paszek, H. Pemble, A. Ettinger, S. Gierke, and T. Wittmann. 2014. CLASPs link focal-adhesion-associated microtubule capture to localized exocytosis and adhesion site turnover. *Nat Cell Biol.* 16:561-73.

Theisen, U., E. Straube, and A. Straube. 2012. Directional persistence of migrating cells requires Kif1C-mediated stabilization of trailing adhesions. *Dev Cell.* 23:1153-66.

van der Vaart, B., W.E. van Riel, H. Doodhi, J.T. Kevenaar, E.A. Katrukha, L. Gumy, B.P. Bouchet, I. Grigoriev, S.A. Spangler, K.L. Yu, P.S. Wulf, J. Wu, G. Lansbergen, E.Y. van Battum, R.J. Pasterkamp, Y. Mimori-Kiyosue, J. Demmers, N. Olieric, I.V. Maly, C.C. Hoogenraad, and A. Akhmanova. 2013. CFEOM1-associated kinesin KIF21A is a cortical microtubule growth inhibitor. *Dev Cell.* 27:145-60.

van Zundert, G.C., J.P. Rodrigues, M. Trellet, C. Schmitz, P.L. Kastitis, E. Karaca, A.S. Melquiond, M. van Dijk, S.J. de Vries, and A.M. Bonvin. 2016. The HADDOCK2.2 Web

1 Server: User-Friendly Integrative Modeling of Biomolecular Complexes. *J Mol Biol.*  
2 428:720-5.

3 Wehrle-Haller, B. 2012. Assembly and disassembly of cell matrix adhesions. *Curr Opin Cell*  
4 *Biol.* 24:569-81.

5 Wishart, D.S., C.G. Bigam, J. Yao, F. Abildgaard, H.J. Dyson, E. Oldfield, J.L. Markley, and  
6 B.D. Sykes. 1995. <sup>1</sup>H, <sup>13</sup>C and <sup>15</sup>N chemical shift referencing in biomolecular NMR. *J*  
7 *Biomol NMR.* 6:135-40.

8 Yan, J., M. Yao, B.T. Goult, and M.P. Sheetz. 2015. Talin Dependent Mechanosensitivity of Cell  
9 Focal Adhesions. *Cell Mol Bioeng.* 8:151-159.

10 Yao, M., B.T. Goult, H. Chen, P. Cong, M.P. Sheetz, and J. Yan. 2014. Mechanical activation of  
11 vinculin binding to talin locks talin in an unfolded conformation. *Sci Rep.* 4:4610.

12 Yao, M., B.T. Goult, B. Klapholz, E. Hu, C.P. Toseland, Y. Guo, P. Cong, M. Sheetz, and J. Yan.  
13 2016. The mechanical response of talin. *Nature Comm.* in press.

14 Zacharchenko, T., X. Qian, B.T. Goult, D. Jethwa, T. Almeida, C. Ballestrem, D.R. Critchley,  
15 D.R. Lowy, and I.L. Barsukov. 2016. LD-motif recognition by talin: structure of the talin-  
16 DLC1 complex. . *Structure.*

# Figure Legends

## Figure 1. The KN motif of KANK1 interacts with the R7 domain of talin1.

**A.** Schematic representation of KANK1 and the deletion mutants used in this study, and the summary of their interactions and localization. N.d., not determined in this study.

**B.** TIRFM images of live HeLa cells transiently expressing the indicated GFP-tagged KANK1 deletion mutants together with the focal adhesion marker mCherry-paxillin.

**C.** Identification of the binding partners of Bio-GFP-tagged KANK1 and its indicated deletion mutants by using streptavidin pull down assays from HEK293T cells combined with mass spectrometry.

**D.** Streptavidin pull down assays with the BioGFP-tagged KANK1 or the indicated KANK1 mutants, co-expressed with GFP-talin1 in HEK293T cells, analyzed by Western blotting with the indicated antibodies.

**E.** Sequence alignment of KANK1 and KANK2 with the known talin-binding sites of DLC1, RIAM and Paxillin. The LD-motif and the interacting hydrophobic residues are highlighted green and blue respectively.

**F.** Schematic representation of talin1 and the deletion mutants used in this study, and their interaction with KANK1.

**G.** Streptavidin pull down assays with the BioGFP-tagged talin1 or the indicated talin1 mutants, co-expressed with HA-KANK1 in HEK293T cells, analyzed by Western blotting with the indicated antibodies.

## Figure 2. Biochemical and structural characterization of the Talin-KANK interaction.

**A.** Schematic representation of Talin1, with F-actin,  $\beta$ -integrin and vinculin binding sites highlighted. The KANK1 binding site on R7 is also shown.

**B.** The structure of the complex between talin1 R7-R8 (white) and the LD-motif of DLC1 (yellow) bound on the R8 subdomain (PDB ID. 5FZT, (Zacharchenko et al., 2016)). Residues W1630 and Y1389 (blue) and S1641 (magenta) are highlighted.

**C-D.** The KANK KN domain binds to a novel site on talin R7.  $^1\text{H}$ ,  $^{15}\text{N}$  HSQC spectra of 150  $\mu\text{M}$   $^{15}\text{N}$ -labelled talin1 R7 (residues 1357-1659  $\Delta$ 1454-1586) in the absence (black) or presence of KANK1(30-68)C peptide (red) (top panel) or KANK1-4A (green) (bottom panel) at a ratio of 1:3.

**D.** Mapping of the KANK1 binding site on R7 as detected by NMR using weighted chemical shift differences (red) – mapped onto the R7-R8 structure in (B). Residues W1630 and Y1389 (blue) and G1404 and S1641 (magenta) are highlighted.

**E.** Structural model of the talin1:KANK1 interface. Ribbon representation of the KANK1 binding site, comprised of the hydrophobic groove between helices 29 and 36 of R7. Two bulky conserved residues, W1630 and Y1389 (blue) hold these two helices apart forming the binding interface. A small glycine side chain (G1404) creates a pocket between the helices. S1641 (magenta) has been shown previously to be a phosphorylation site (Ratnikov et al., 2005). The KN peptide (green) docked onto the KANK binding surface.

**F-G.** Biochemical characterization of the talin:KANK interaction. (F) Binding of BODIPY-labeled KANK1(30-60)C, KANK2(31-61)C and KANK1-4A peptides to Talin1 R7-R8 (1357-1659) was measured using a Fluorescence Polarization assay. (G) Binding of BODIPY-labeled KANK1(30-60)C to wild type R7-R8, R7-R8 S1641E, R7-R8 G1404L and R7-R8 W1630A. Dissociation constants  $\pm$  SE ( $\mu$ M) for the interactions are indicated in the legend. ND, not determined.

### **Figure 3. KANK1-talin interaction is required for recruiting KANK1 to FAs.**

**A.** Streptavidin pull-down assays with the BioGFP-tagged KANK1 or the indicated KANK1 mutants, co-expressed with GFP-talin1 in HEK293T cells, analyzed by Western blotting with the indicated antibodies.

**B.** Streptavidin pull down assays with the BioGFP-tagged talin1 or the indicated talin1 mutants, co-expressed with HA-KANK1 in HEK293T cells, analyzed by Western blotting with the indicated antibodies.

**C.** TIRFM images of live HeLa cells depleted of KANK1 and KANK2 and co-expressing the indicated siRNA-resistant GFP-KANK1 fusions and TagRFP-paxillin.

**D.** Fluorescence profile of GFP-tagged mutants and TagRFP-paxillin based on line scan measurement across FA area in TIRFM images as in panel (C).

**E.** Widefield fluorescence images of HeLa cells depleted of endogenous talin1 and talin2, rescued by the expression of the wild type GFP-tagged mouse talin1 or its G1404L mutant and labeled for endogenous KANK1 by immunofluorescence staining.

**F.** Quantification of peripheral clustering of KANK1 in cells treated and analyzed as in (E) (n=12, 6 cells per condition). Error bar, SEM; \*\*\*,  $P < 0.001$ , Mann-Whitney U test.

**Figure 4. KANK1-talin interaction is required for recruiting CMSCs to FAs.**

**A.** Widefield fluorescence images of HeLa cells depleted of KANK1 and KANK2 and expressing the indicated siRNA-resistant GFP-KANK1 fusions (rescue), stained for the FA marker phospho-tyrosine (pY).

**B.** Widefield fluorescence images of HeLa cells transfected with the control siRNA or siRNAs against KANK1 and KANK2, expressing GFP alone or the indicated siRNA-resistant GFP-KANK1 fusions and stained for LL5 $\beta$  or KIF21A.

**C.** Quantification of peripheral clustering of LL5 $\beta$  and KIF21A in cells treated as in panel (B) (n=12, 5-6 cells per condition).

**D.** TIRFM images of live HeLa cells depleted of KANK1 and KANK2 and co-expressing the indicated siRNA-resistant GFP-KANK1 fusions and mCherry-CLASP2.

**E.** Quantification of peripheral clustering of mCherry-CLASP2 in cells treated as in panel (D) (n=20, 8 cells per condition).

**F.** Widefield fluorescence images of HeLa cells transfected with the indicated GFP-KANK1 fusions and stained for endogenous LL5 $\beta$ .

**G.** Quantification of peripheral clustering of LL5 $\beta$  in cells treated as in panel (F) (n=12, 6 cells per condition).

**H.** Widefield fluorescence images of HeLa cells transfected with GFP-tagged KANK1 or its CC1 mutant and stained for LL5 $\beta$ .

**I.** Quantification of peripheral clustering of LL5 $\beta$  cells treated as in panel (H) (n=12, 6 cells per condition).

Error bars, SEM; ns, non-significant; \*\*,  $P < 0.005$ ; \*\*\*,  $P < 0.001$ , Mann-Whitney U test.

**Figure 5. The role of talin-KANK1 interaction in regulating microtubule plus end dynamics around FAs.**

**A.** Schematic representation of the pattern of microtubule growth in control HeLa cells and in cells with perturbed CMSCs, based on (van der Vaart et al., 2013).

**B.** TIRFM images of live HeLa cells depleted of KANK1 and KANK2 and co-expressing the indicated siRNA-resistant GFP-KANK1 fusions and EB3-mRFP. Images are maximum intensity projection of 241 images from time lapse recording of both fluorescence channels.

**C.** Distributions of microtubule growth rates at the 3  $\mu$ m broad cell area adjacent to the cell edge, and in the central area of the ventral cortex for the cells treated as described in (B) (n=87-153, 7-8 cells).

**D.** Ratio of microtubule growth rate in the cell center and at the cell edge for the cells treated as described in B (n=7-8 cells).

**E.** Angles of microtubule growth relative to the cell margin for the cells treated as described in B. Box plots indicate the 25th percentile (bottom boundary), median (middle line), mean (red dots), 75th percentile (top boundary), nearest observations within 1.5 times the interquartile range (whiskers) and outliers (black dots) (n=93-114, 7-8 cells).

**F.** TIRFM images of live HeLa cells depleted of talin1 and talin 2 and co-expressing the indicated GFP-talin1 fusions and EB3-mRFP. Images are maximum intensity projection of 241 images from time lapse recordings of both fluorescence channels.

**G.** Distributions of microtubule growth rates at the 3  $\mu$ m broad cell area adjacent to the cell edge, and in the central area of the ventral cortex for the cells treated as described in F (n=88-154, 7 cells).

**H.** Ratio of microtubule growth rate in the cell center and at the cell edge for the cells treated as described in panel (F) (n=7 cells).

**I.** Angles of microtubule growth relative to the cell margin for the cells treated as described in F. Box plots as in (E) (n=155-166, 10 cells).

In all plots: error bars, SEM; ns, non-significant; \*\*,  $P < 0.01$ ; \*\*\*,  $P < 0.001$ , Mann-Whitney U test.

## **Figure 6. Model of talin-directed assembly of cortical microtubule stabilizing complex.**

**A.** Three-step CMSC clustering around focal adhesion: 1) KANK1 binds talin rod domain R7 via the KN motif, 2) KANK1 initiates a cortical platform assembly by binding liprin- $\beta$ 1 via its CC1 domain, 3) completion of CMSC assembly by further clustering of liprins, ELKS, LL5 $\beta$ , CLASP and KIF21A around FA.

- 1 **B.** KANK1 binding to nascent talin clusters acts as a “seed” for macromolecular complex
- 2 assembly and organization around a FA.
- 3
- 4

## Figure Supplements

### Figure 1 – Figure Supplement 1. KANK1 colocalizes with CMSC components around FAs.

A. Widefield fluorescence images of HeLa cells stained for endogenous proteins as indicated. In the two bottom panels, cells were transfected with GFP-KANK1. pY, phospho-tyrosine, a FA marker.

B. Widefield fluorescence images of HaCaT cells stained for endogenous proteins as indicated.

### Figure 1 – Figure Supplement 2. Characterization of protein clustering in and around FAs.

A. Widefield fluorescence images of HeLa cells stained as indicated and treated with blebbistatin as indicated.

B. Quantification of peripheral clustering of LL5 $\beta$  in cells treated as in panel (A) (n=25-30, 6 cells per condition).

C. GFP-KN-LacZ fusion localizes to the inner part of FAs. TIRFM images of live HeLa cells transfected with TagRFP-paxillin and GFP-tagged KN peptide, KN-LacZ or  $\Delta$ ANKR KANK1 mutant.

### Figure 2 - Figure Supplement 1. NMR validation of the Talin1 R7-R8 mutants.

$^1\text{H}$ ,  $^{15}\text{N}$  HSQC spectra of; (A) Talin1 R7-R8 domain, (B) G1404L Talin1 R7-R8 mutant, and (C) W1630A Talin1 R7-R8 Mutant. The mutant spectra show good peak distribution with uniform intensity similar to the wildtype suggesting that they are correctly folded.

### Figure 2 - Figure Supplement 2. Biochemical characterization of the Talin2:KANK interaction

Binding of BODIPY-labeled KANK1(30-60)C, KANK2(31-61)C and KANK1-4A peptides to Talin2 R7-R8 measured using a Fluorescence Polarization assay. Dissociation constants  $\pm$  SE ( $\mu\text{M}$ ) for the interactions are indicated in the legend. ND, not determined.

### Figure 3 – Figure Supplement 1. GFP-talin1 and its G1404L mutant support cell spreading and formation of FAs in cells depleted of talin1 and talin2.

HeLa cells co-depleted of talin1 and talin2 were transfected with the indicated talin-1 fusions and stained for the endogenous KANK1.



# Figure 1

Bouchet et al.

A

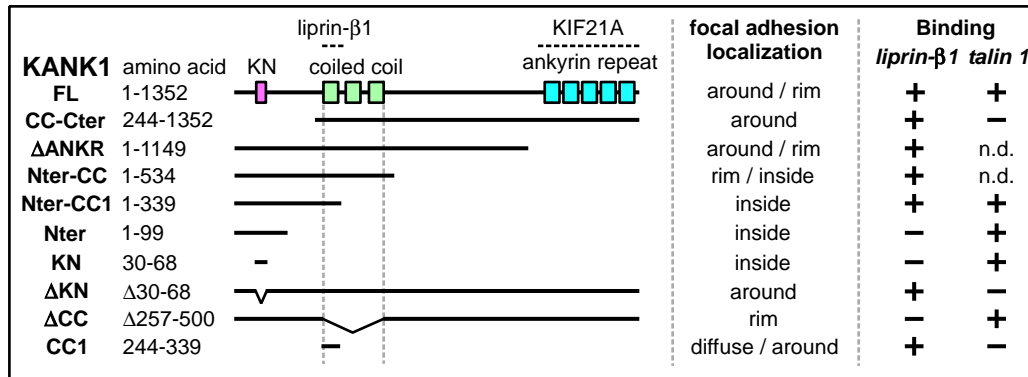

B

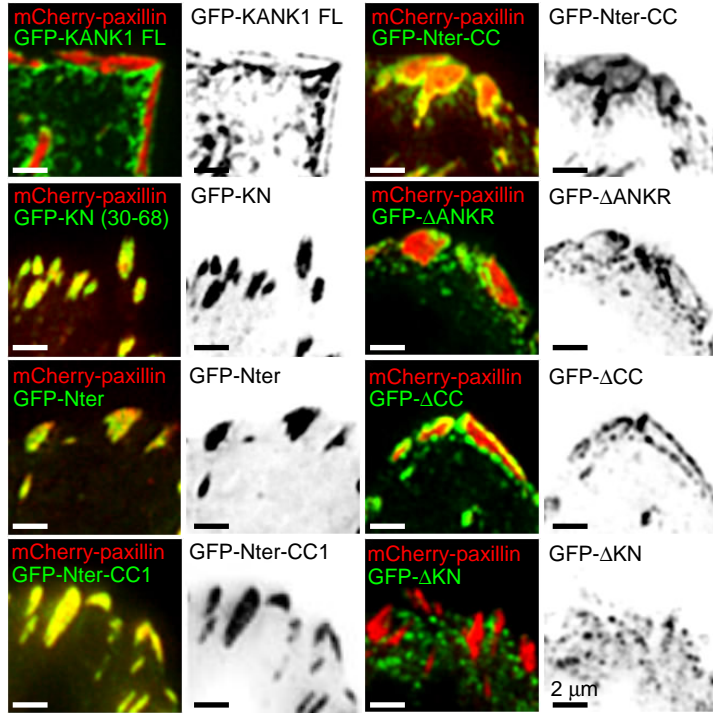

C

| bioGFP-KANK1 FL pull-down |                  |              |                | protein                                | accession number | Mascot score | unique peptide |
|---------------------------|------------------|--------------|----------------|----------------------------------------|------------------|--------------|----------------|
| protein                   | accession number | Mascot score | unique peptide | <b>bioGFP-KANK1 1-339 pull-down</b>    |                  |              |                |
| KANK1                     | Q14678           | 6279         | 59             | tal1 1                                 | Q9Y490           | 4014         | 72             |
| KIF21A                    | Q7Z4S6           | 3398         | 55             | tal1 2                                 | Q9Y4G6           | 1508         | 42             |
| liprin-β1                 | Q86W92           | 2544         | 50             | KANK1                                  | Q14678           | 245          | 8              |
| liprin-α1                 | Q13136           | 261          | 9              | <b>bioGFP-KANK1 516-1352 pull-down</b> |                  |              |                |
| tal1 1                    | Q9Y490           | 212          | 9              | KIF21A                                 | Q7Z4S6           | 7410         | 75             |
| LL5β                      | Q86SQ0           | 150          | 8              | KANK1                                  | Q14678           | 2855         | 29             |

D

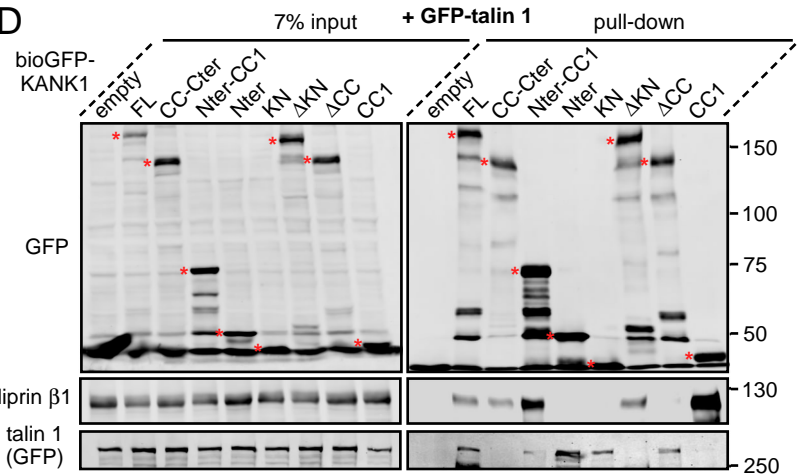

E

466 IFPELDDILYHVKGMRIVNQWSEK 490 DLC1  
 4 SNEDIDQMFSTLLGEMDLLTQSLGV 28 RIAM  
 141 NLSLEDRLLLELNAVQHNPFGPAD 165 PAXILLIN-LD2  
 37 YGFQLDLDFVQYVDIDQKGNITIKK 60 KANK1  
 38 YGYRLDLDFLKYVDIDIEKGHITLR 60 KANK2

F

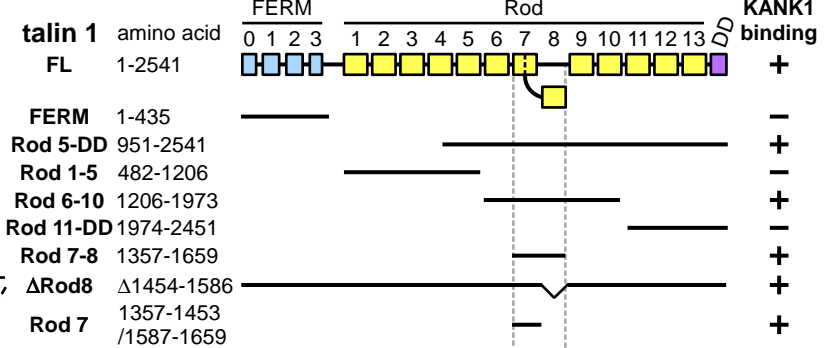

G

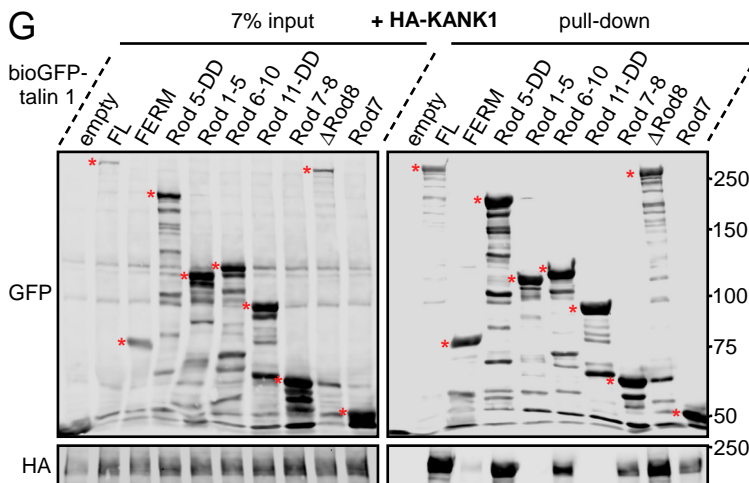

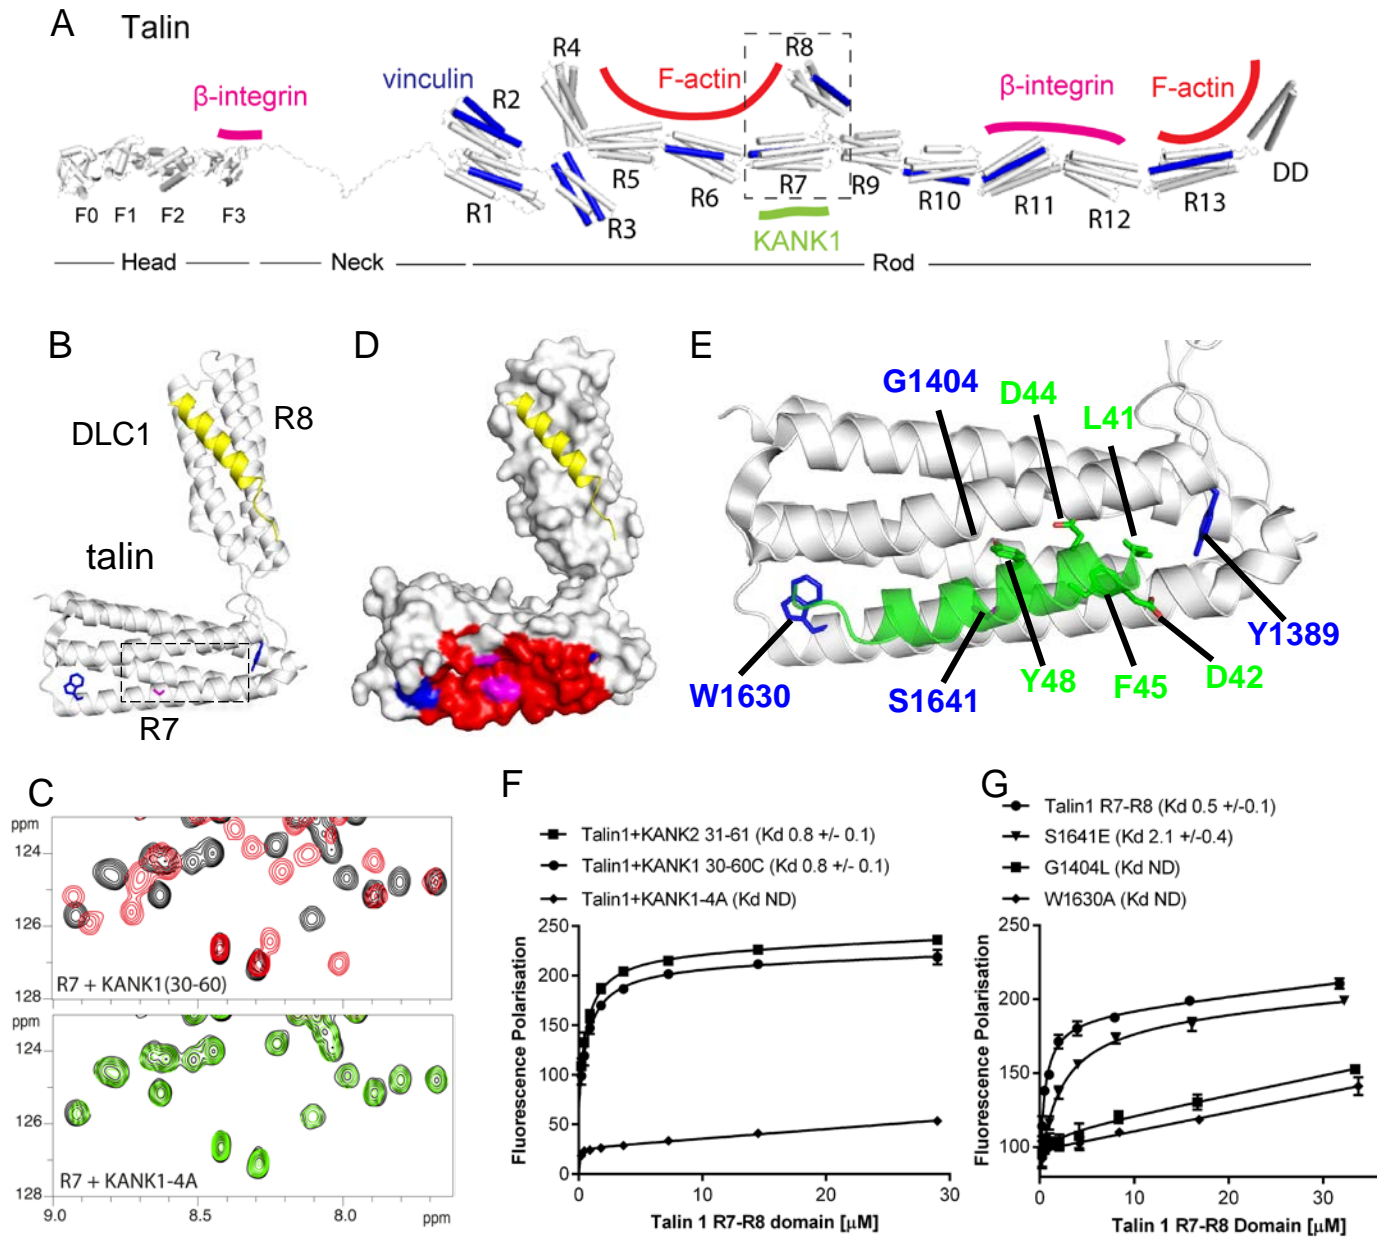

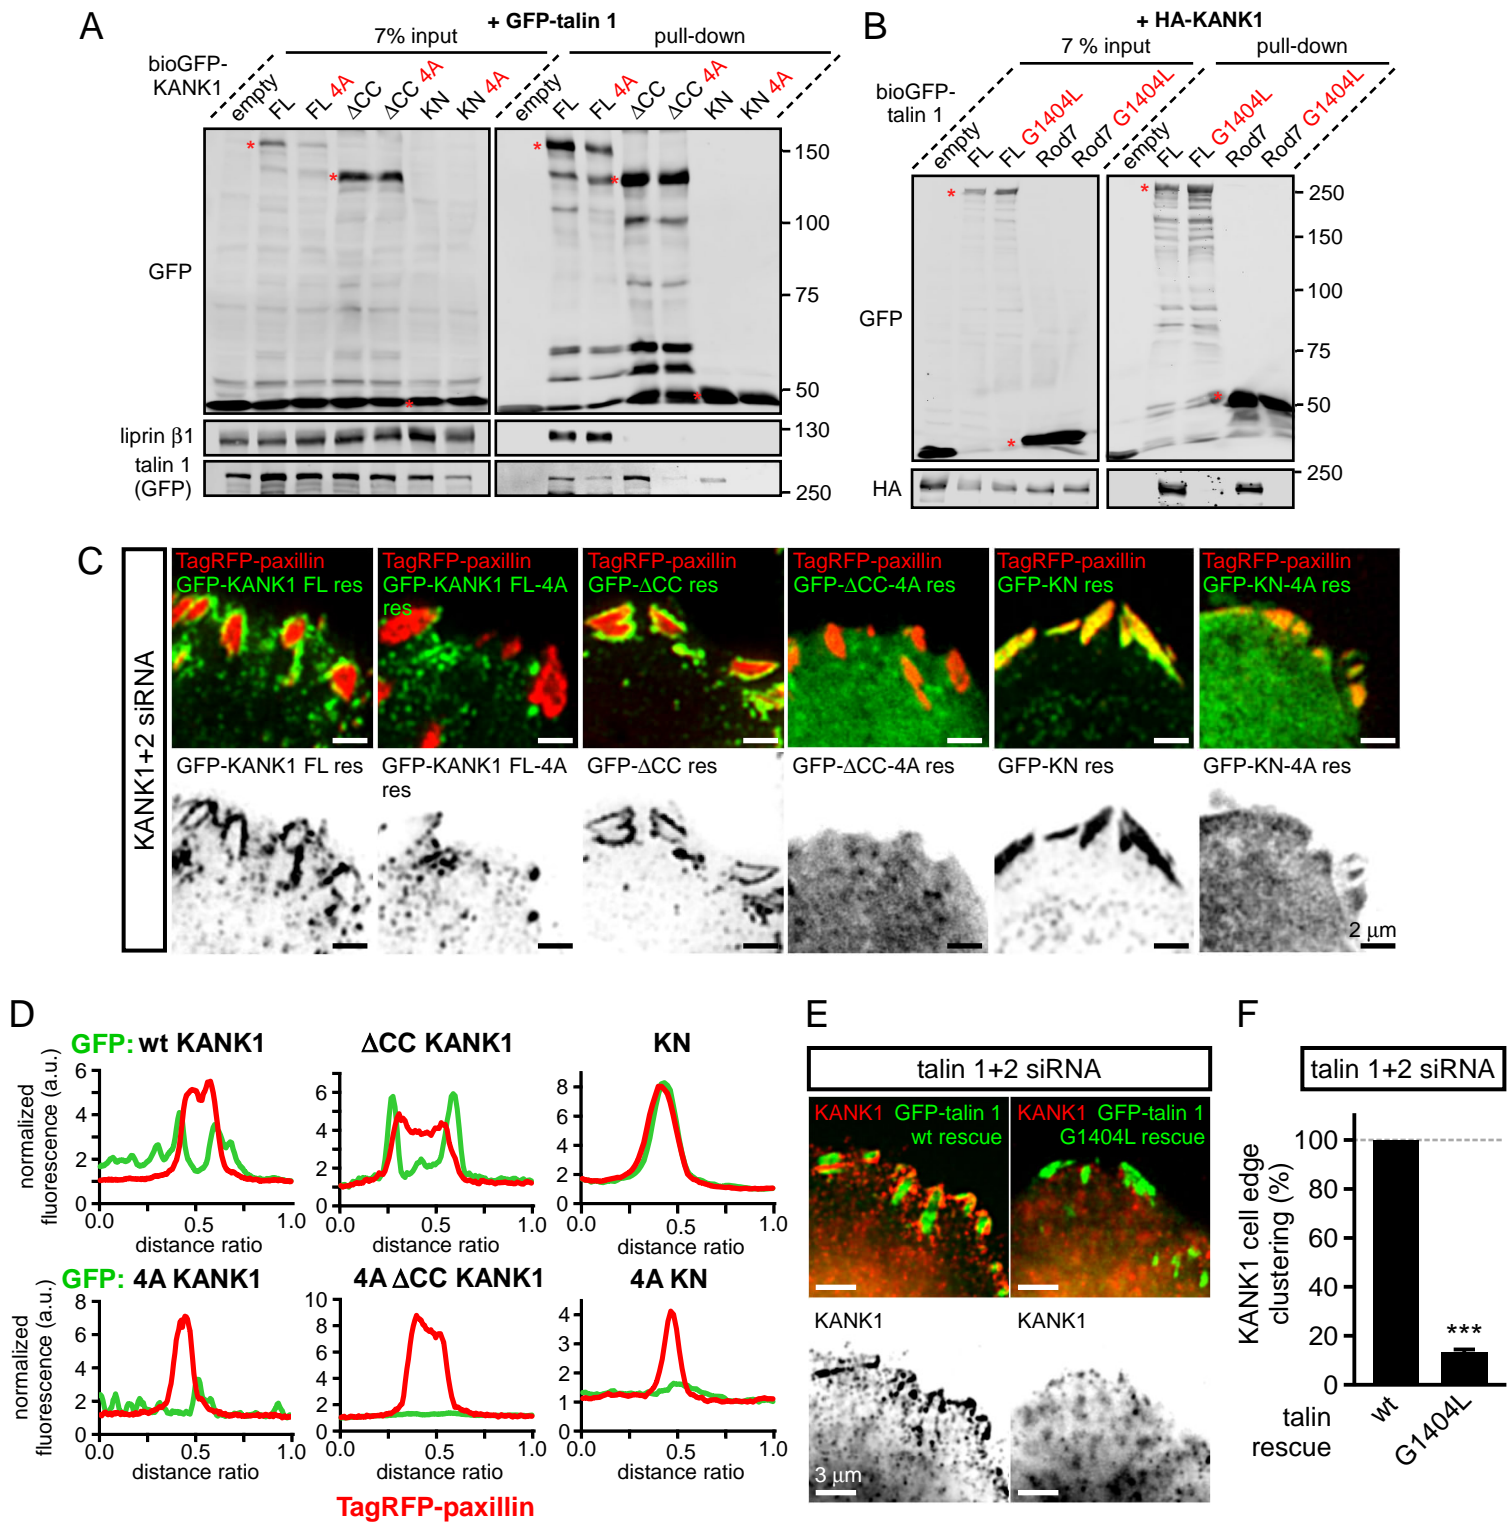



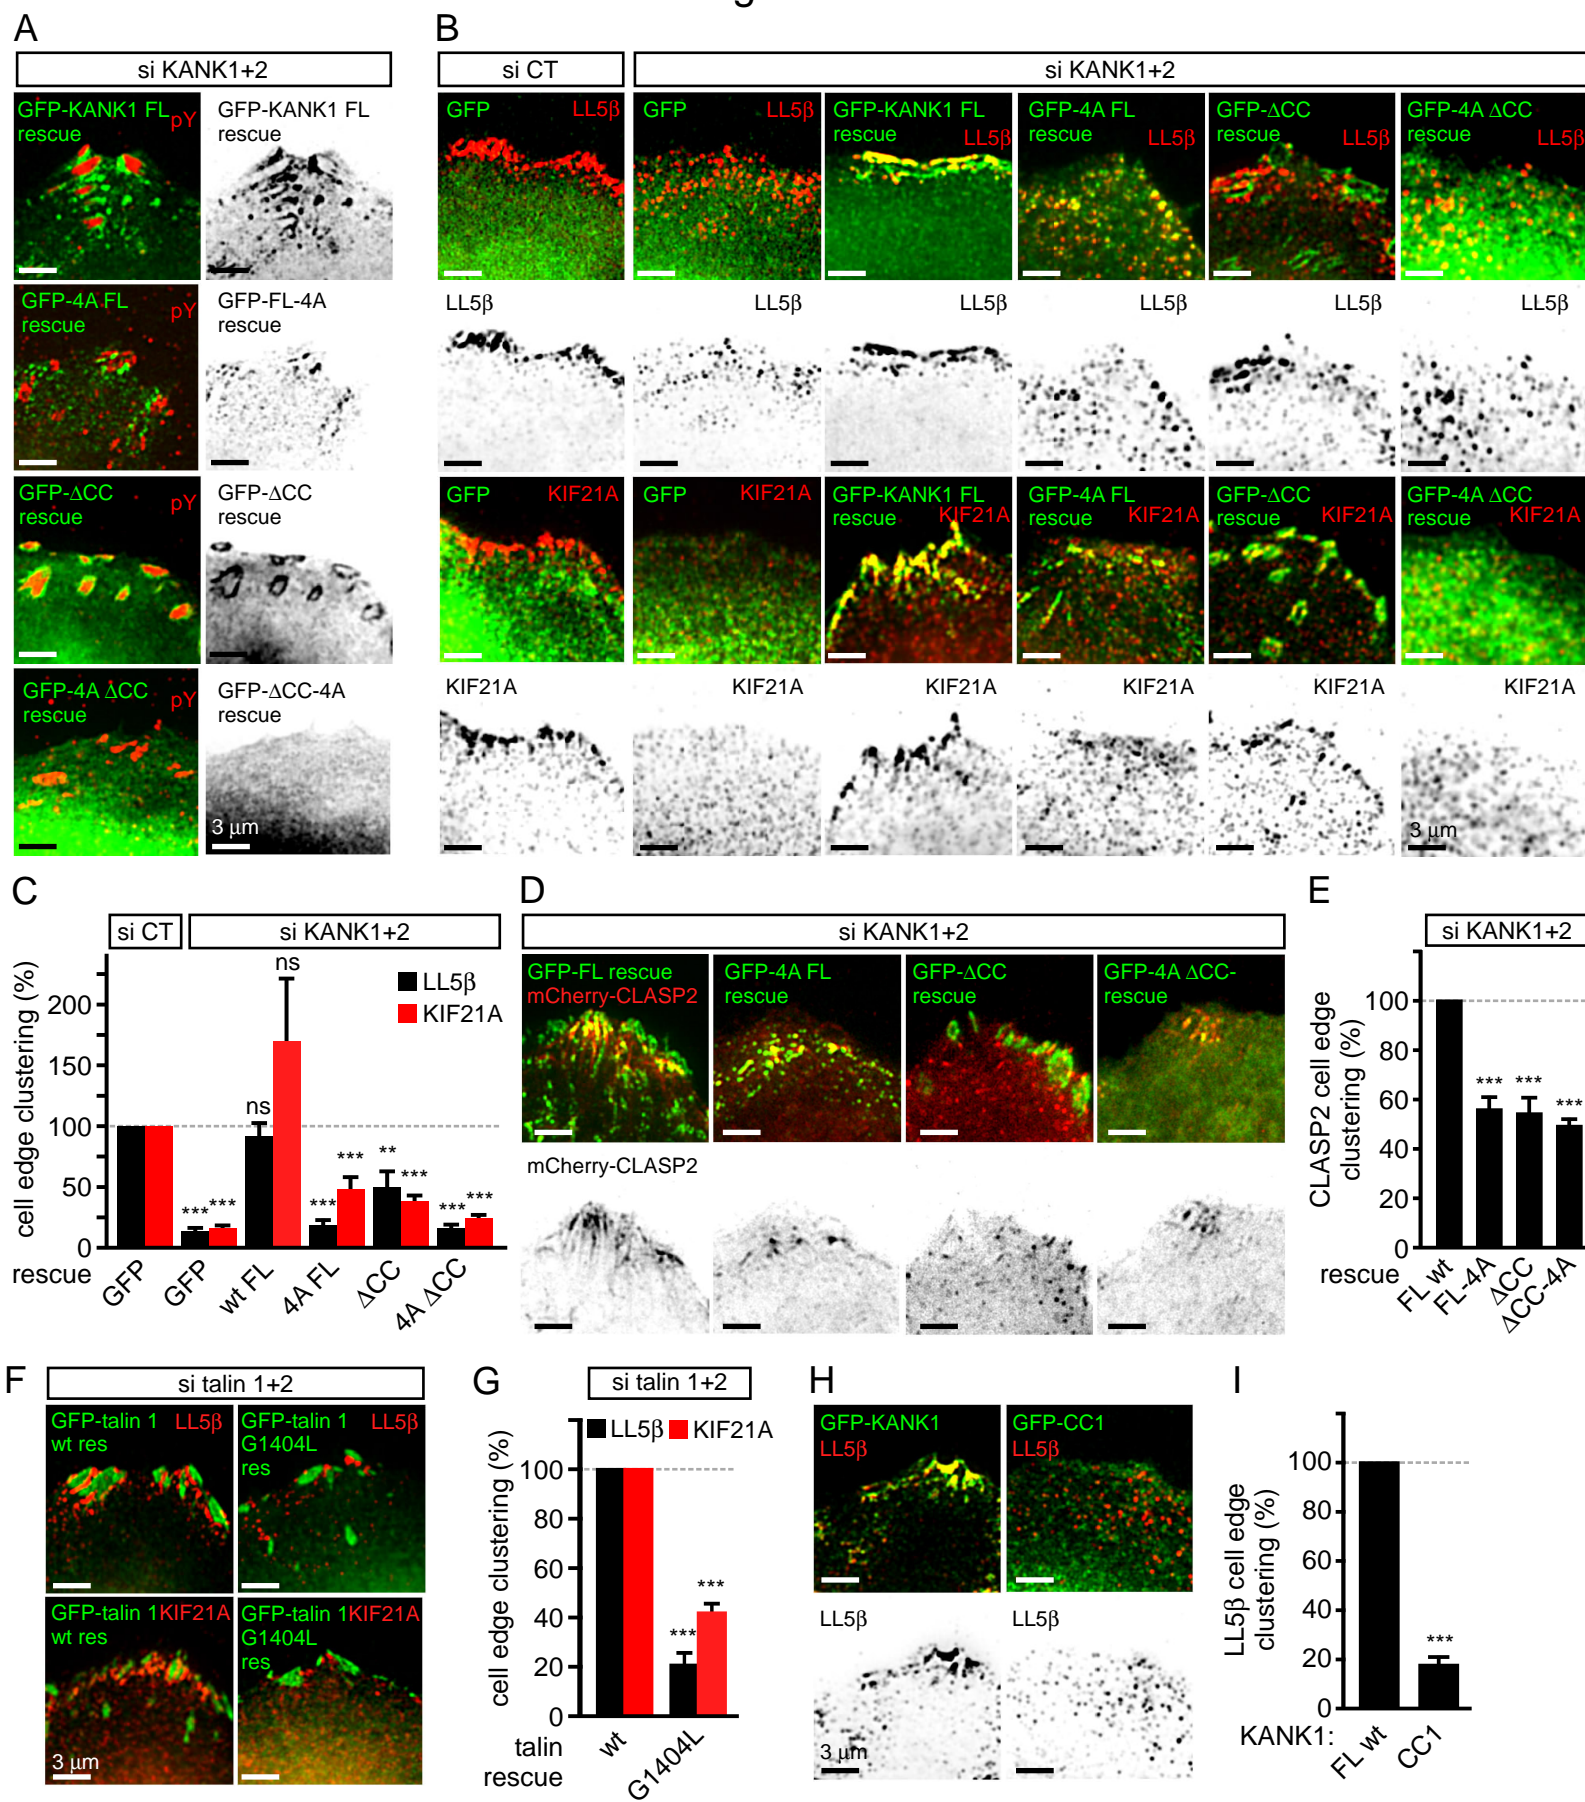

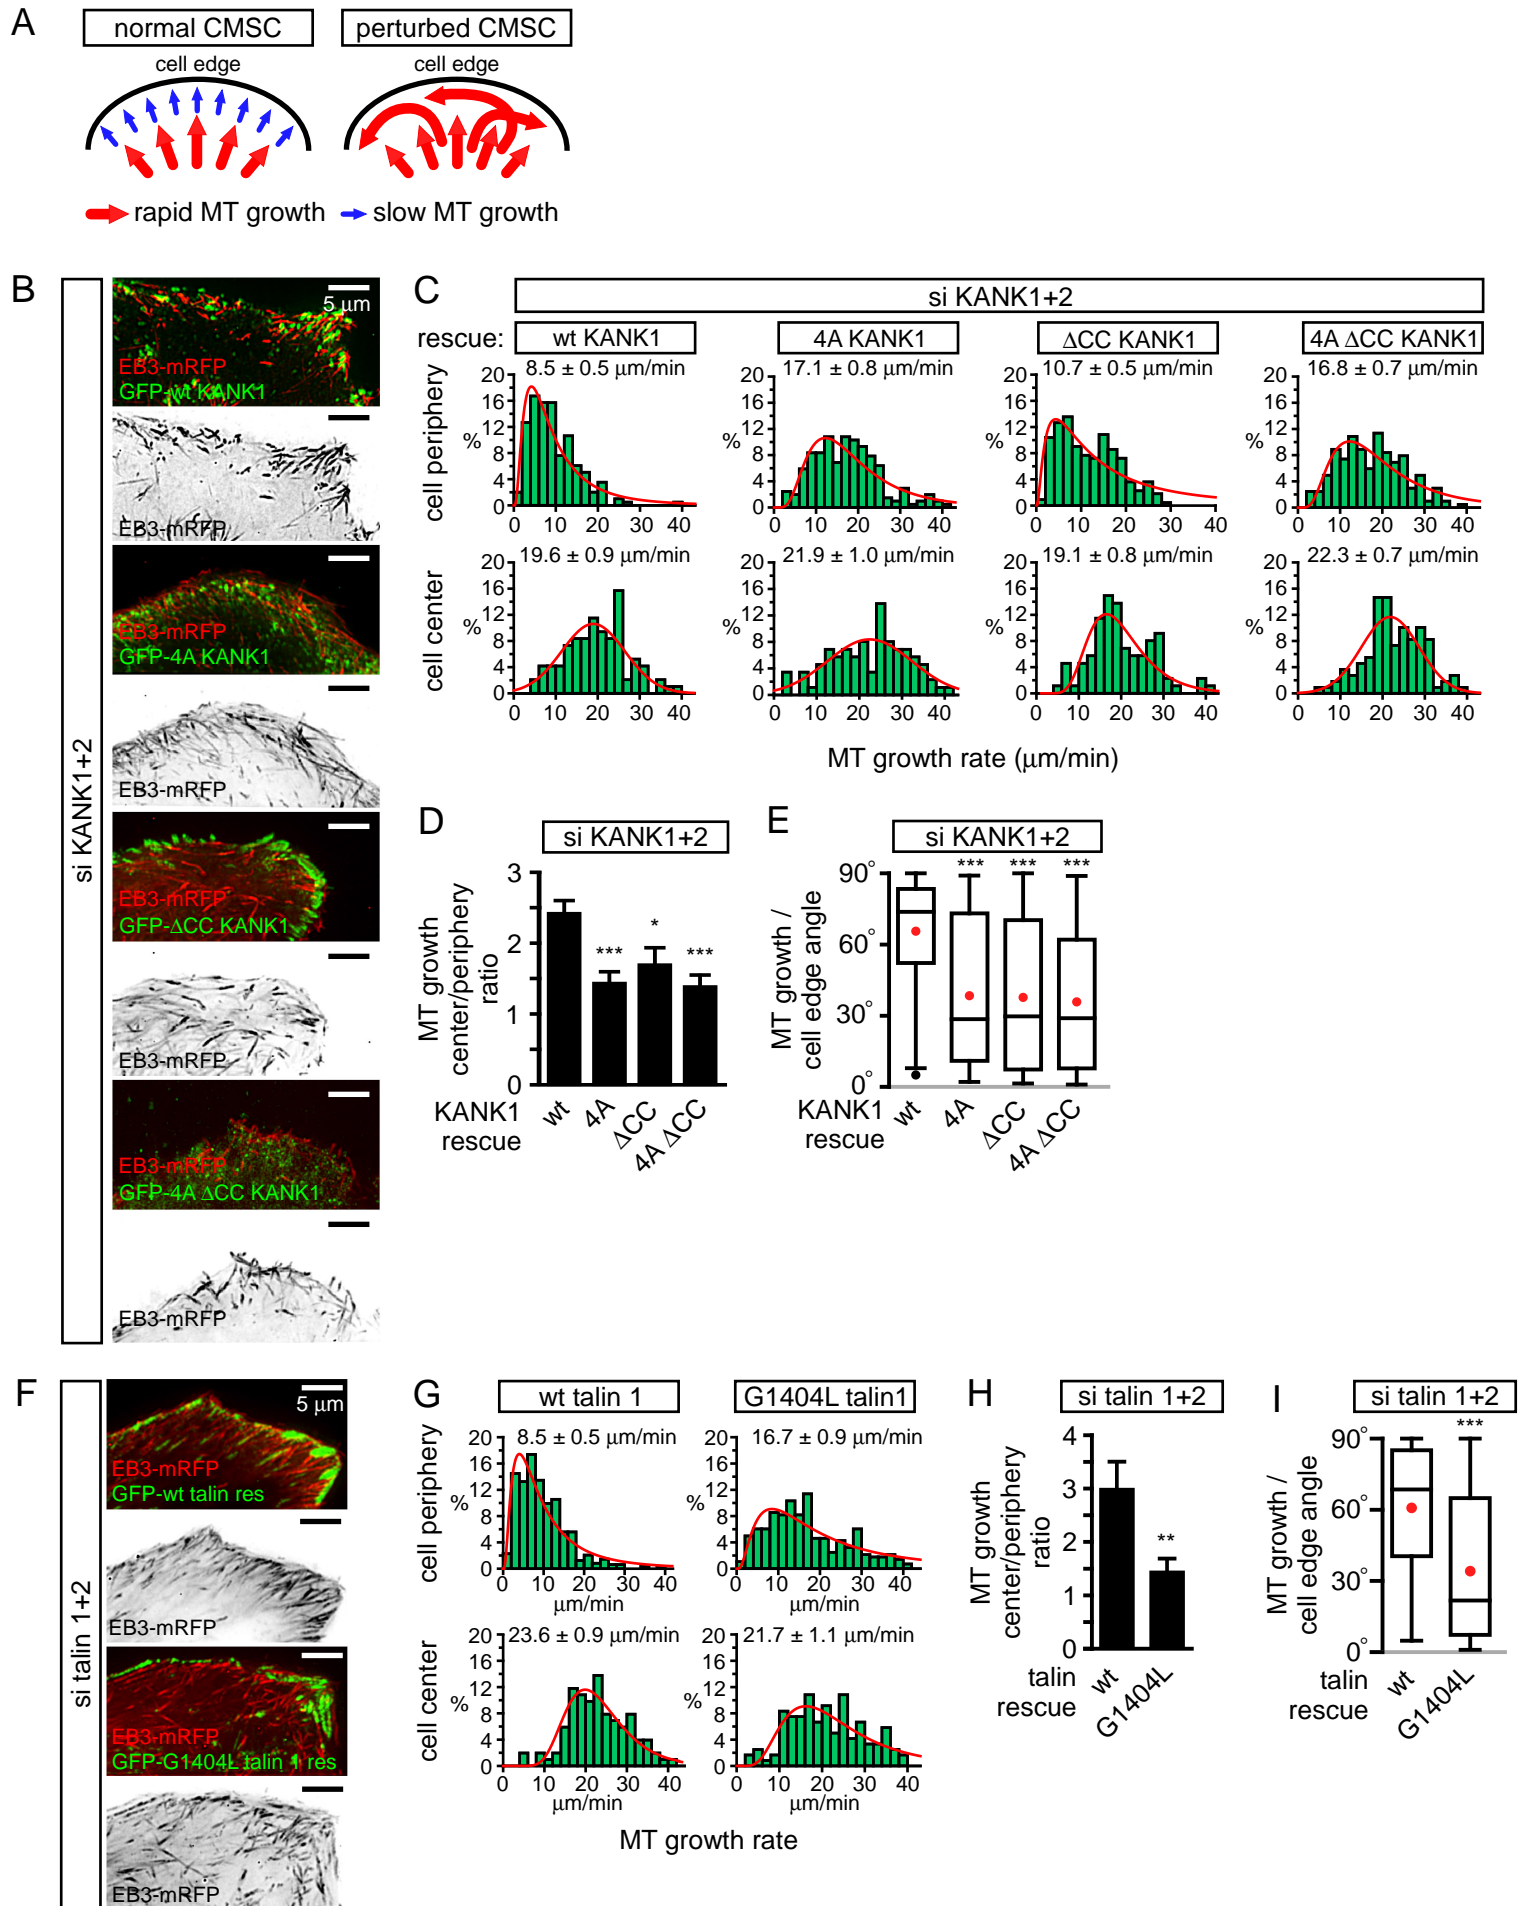

A

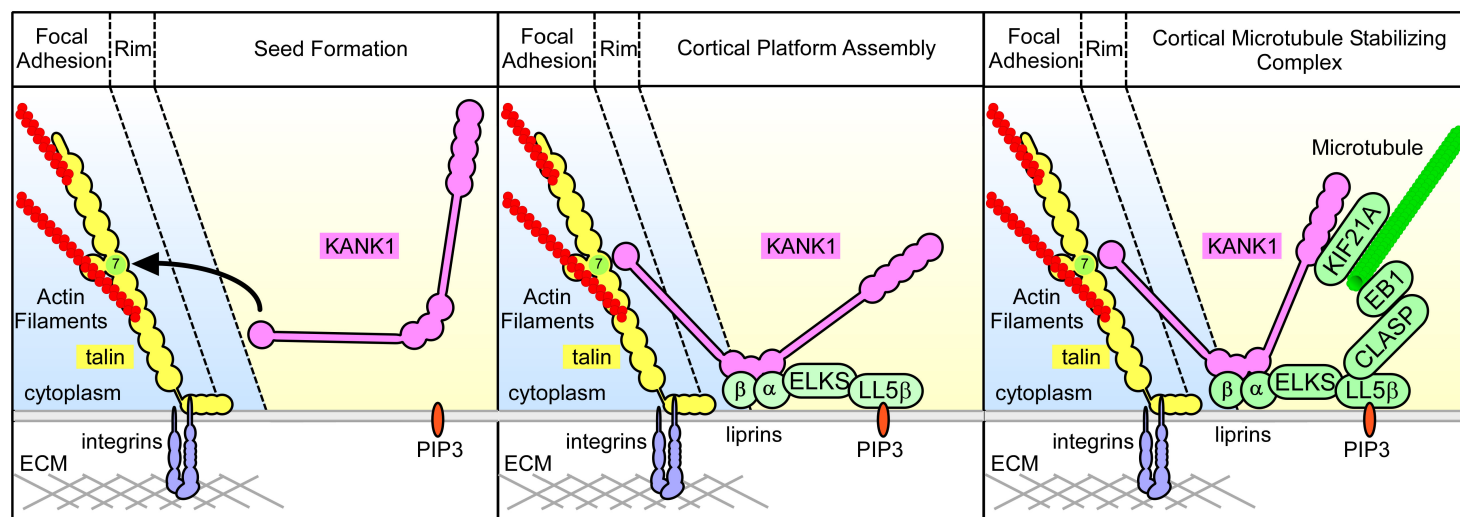

B

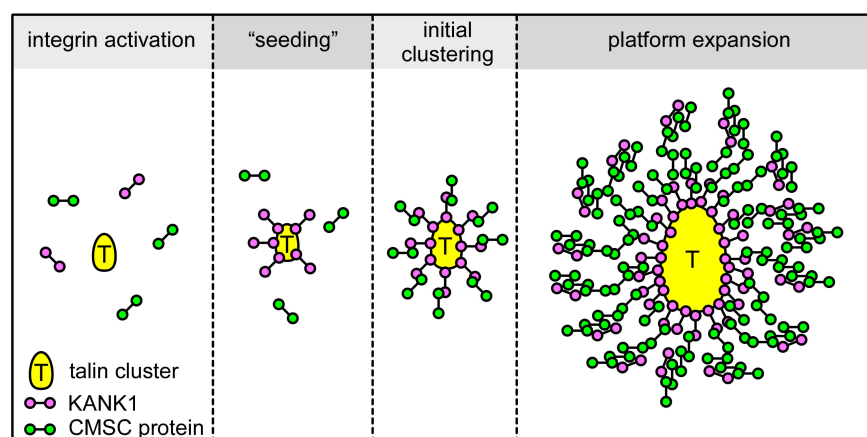



# Figure 1 supplement 1

Bouchet *et al.*

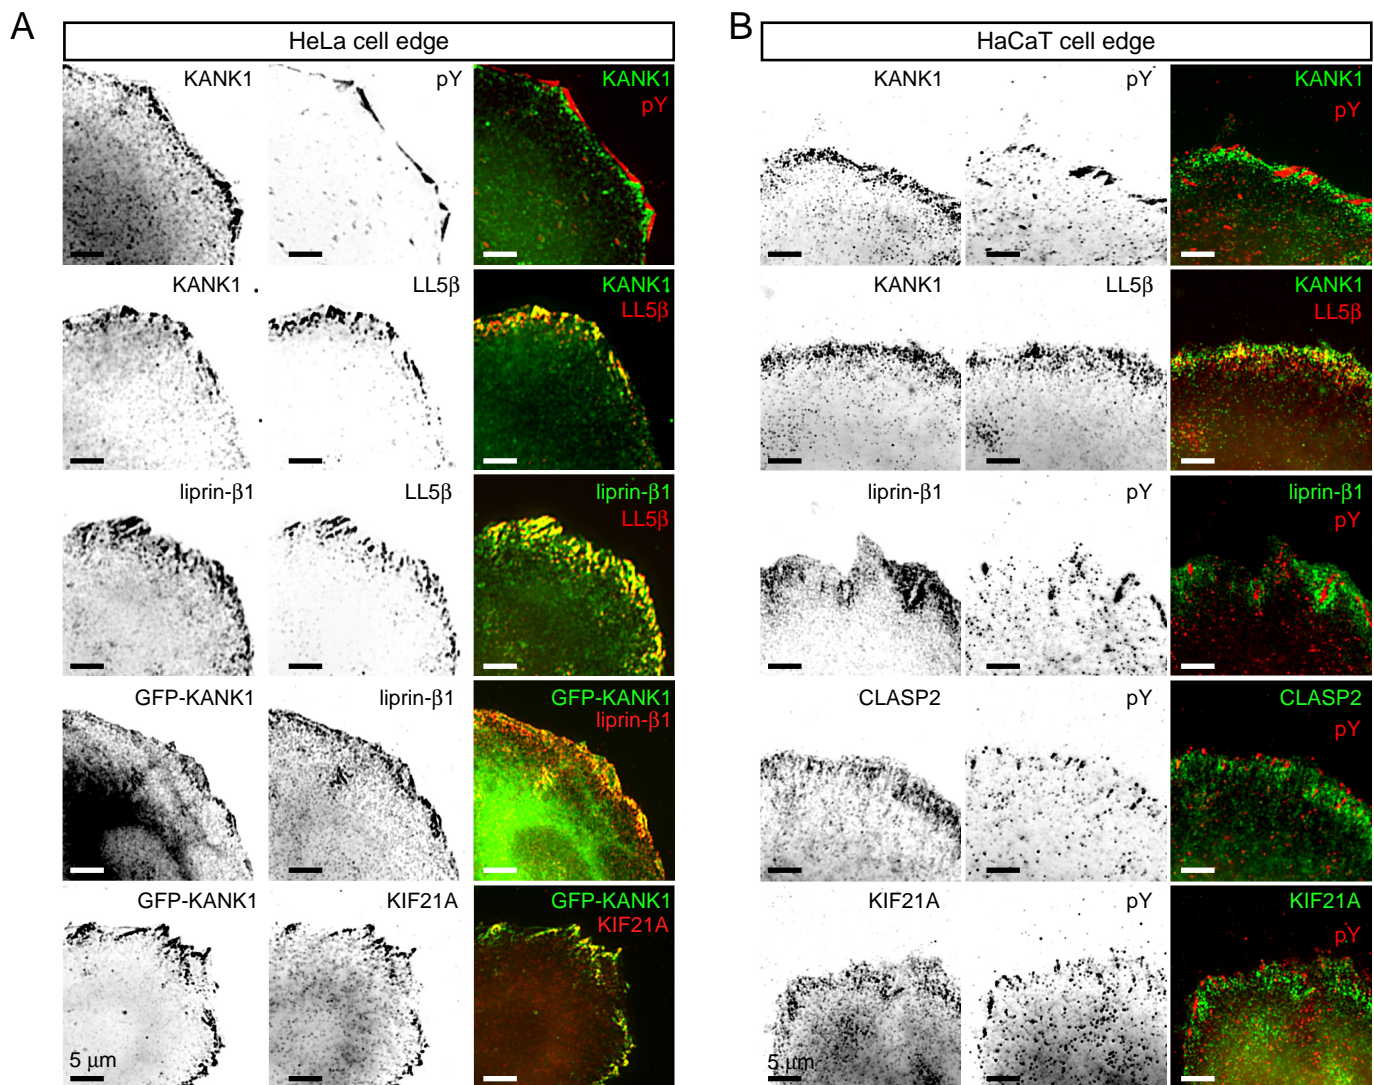

# Figure 1 supplement 2

Bouchet *et al.*

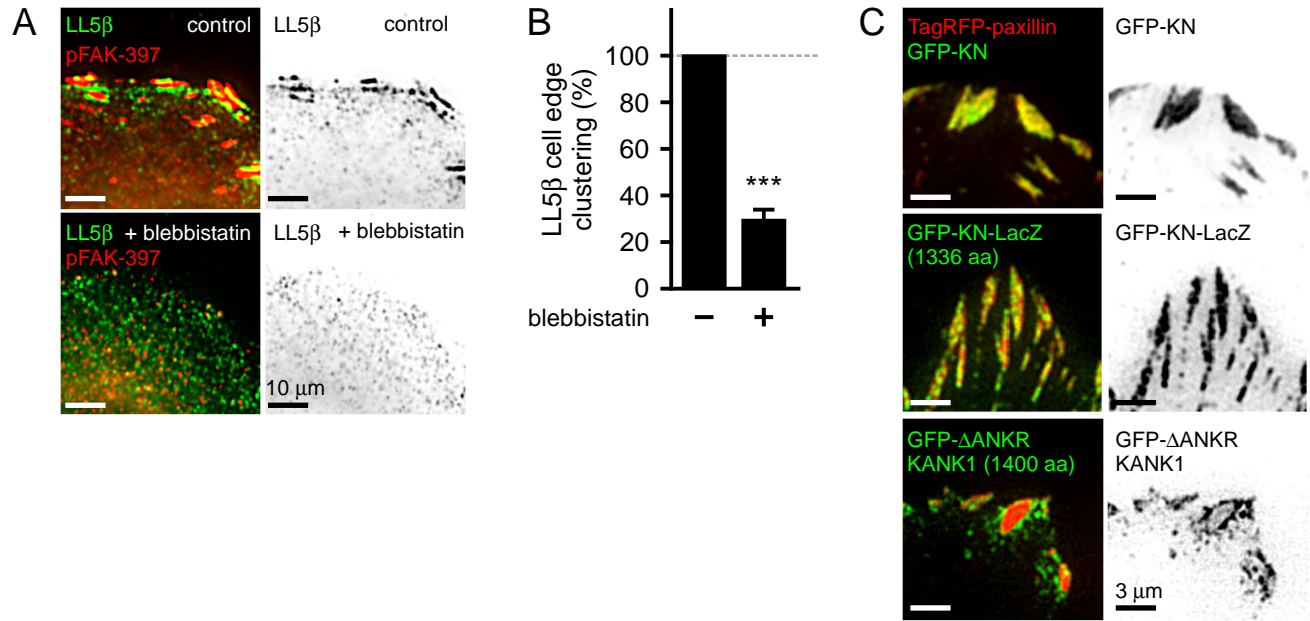



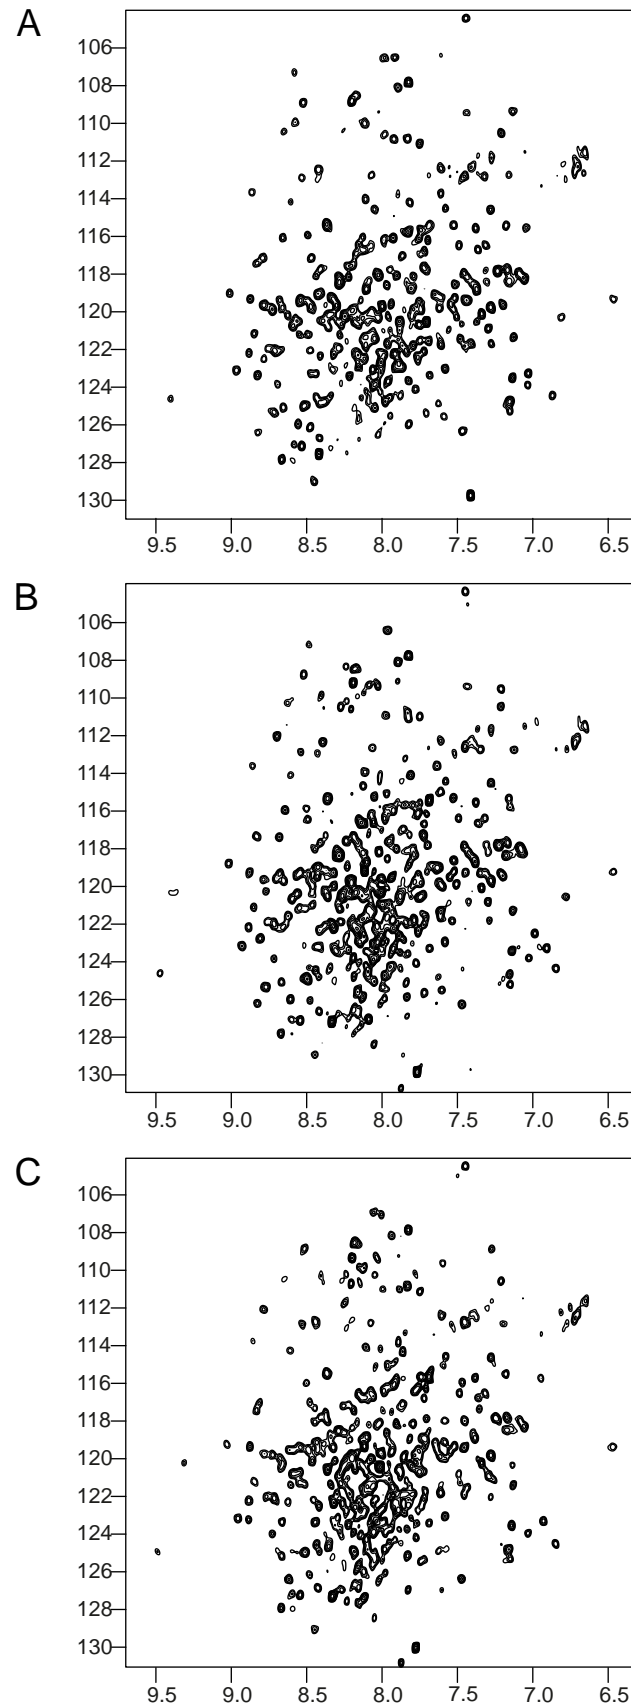

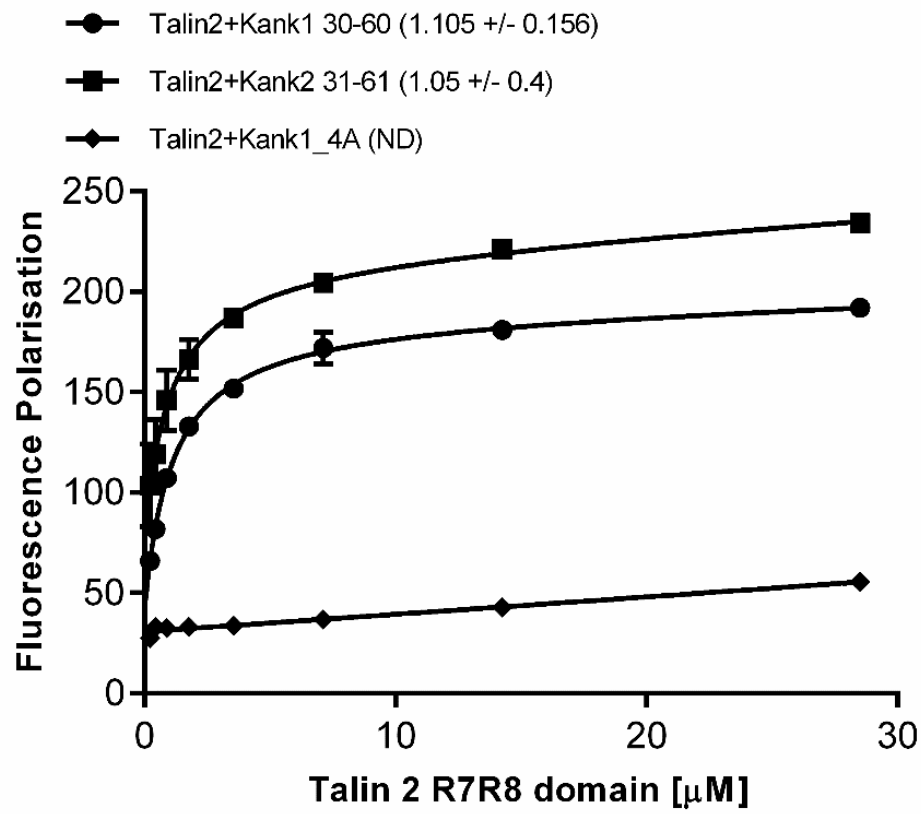

# Figure 3 supplement 1

Bouchet *et al.*

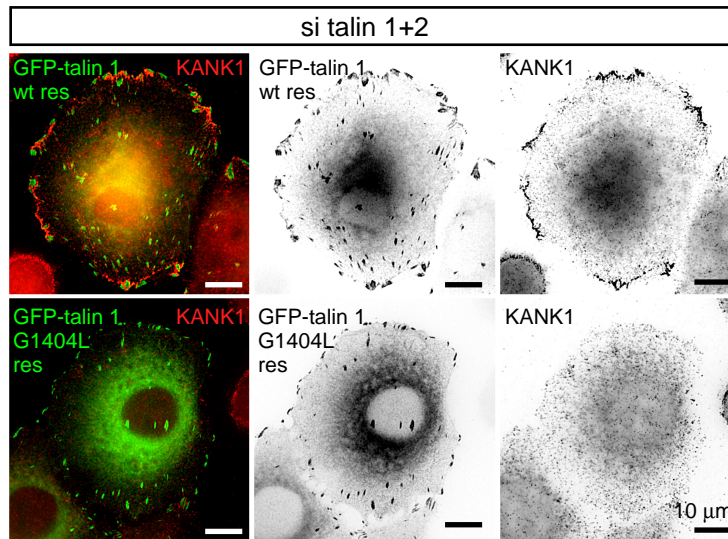

Source: http://biorxiv.org/content/10.1101/055210v1.full.pdf
